1 **Genetic overlap between multivariate measures of human functional brain connectivity and**  
2 **psychiatric disorders**

3  
4 Daniel Roelfs<sup>1,\*</sup>, Dennis van der Meer<sup>1,2</sup>, Dag Alnæs<sup>1,3</sup>, Oleksandr Frei<sup>1,4</sup>, Robert Loughnan<sup>5</sup>, Chun Chieh  
5 Fan<sup>6,7,8</sup>, Anders M. Dale<sup>9,8,10</sup>, Ole A. Andreassen<sup>1,11</sup>, Lars T. Westlye<sup>1,11,12</sup>, Tobias Kaufmann<sup>1,13\*</sup>

6  
7 <sup>1</sup> *NORMENT, KG Jebsen Centre for Neurodevelopmental Disorders, Division of Mental Health and*  
8 *Addiction, Oslo University Hospital & Institute of Clinical Medicine, University of Oslo, Oslo, Norway*

9 <sup>2</sup> *School of Mental Health and Neuroscience, Faculty of Health, Medicine, and Life Sciences, Maastricht*  
10 *University, Maastricht, the Netherlands*

11 <sup>3</sup> *Bjørknes College, Oslo, Norway*

12 <sup>4</sup> *Center for Bioinformatics, Department of Informatics, University of Oslo, Oslo, Norway*

13 <sup>5</sup> *Departement of Cognitive Science, University of California, San Diego, 9500 Gilman Drive, La Jolla,*  
14 *CA 92093 USA*

15 <sup>6</sup> *Population Neuroscience and Genetics Lab, University of California, San Diego, CA, USA.*

16 <sup>7</sup> *Center for Human Development, University of California, San Diego, CA, USA*

17 <sup>8</sup> *Department of Radiology, School of Medicine, University of California, San Diego, CA, USA*

18 <sup>9</sup> *Department of Neurosciences, University of California San Diego, La Jolla, CA 92037, USA*

19 <sup>10</sup> *Center for Multimodal Imaging and Genetics, University of California at San Diego, La Jolla, CA,*  
20 *92037, USA*

21 <sup>11</sup> *K.G. Jebsen Center for Neurodevelopmental disorders, University of Oslo, Oslo, Norway*

22 <sup>12</sup> *Department of Psychology, University of Oslo, Oslo, Norway*

23 <sup>13</sup> *Tübingen Center for Mental Health, Department of Psychiatry and Psychotherapy, University of*  
24 *Tübingen, Germany*

25  
26 \* Correspondence: Daniël Roelfs & Tobias Kaufmann, PhD.

27 Email: [daniel.roelfs@medisin.uio.no](mailto:daniel.roelfs@medisin.uio.no), [tobias.kaufmann@medisin.uio.no](mailto:tobias.kaufmann@medisin.uio.no)

28 Postal address: OUS, PO Box 4956 Nydalen, 0424 Oslo, Norway

29 Telephone: +47 23 02 73 50, Fax: +47 23 02 73 33

30  
31 Counts: Main: 2426 words | Abstract: 135 words | Figures: 4 | References: 66

32

## Roelfs et al. | Genetics of the brain functional connectome

### 33 **Abstract**

34 Psychiatric disorders are complex, heritable, and highly polygenic. Supported by findings of abnormalities  
35 in functional magnetic resonance imaging (fMRI) based measures of brain connectivity, current  
36 theoretical and empirical accounts have conceptualized them as disorders of brain connectivity and  
37 dysfunctional integration of brain signaling, however, the extent to which these findings reflect common  
38 genetic factors remains unclear. Here, we performed a multivariate genome-wide association analysis of  
39 fMRI-based functional brain connectivity in a sample of 30,701 individuals from the UK Biobank and  
40 investigated the shared genetic determinants with seven major psychiatric disorders. The analysis revealed  
41 significant genetic overlap between functional brain connectivity and schizophrenia, bipolar disorder,  
42 attention-deficit hyperactivity disorder, autism spectrum disorder, anxiety, and major depression, adding  
43 further genetic support for the dysconnectivity hypothesis of psychiatric disorders and identifying  
44 potential genetic and functional targets for future studies.

## 45 **Introduction**

46 Psychiatric disorders are heritable and highly polygenic<sup>1-4</sup>, and carry a high burden of disease, measured  
47 in years lived with disability<sup>5</sup>. Akin to the polygenic architecture of the disorders, where a number of  
48 variants each contribute with small effects, findings from imaging genetics studies have documented a  
49 distributed pattern of small effects across the genome for brain phenotypes derived from magnetic  
50 resonance imaging (MRI)<sup>6</sup>. Likewise, brain imaging studies of psychiatric disorders have revealed  
51 distributed anatomical and functional alterations across the brain, with a large body of literature indicating  
52 alterations in functional brain connectivity in individuals with a range of psychiatric disorders, including  
53 schizophrenia (SCZ; e.g. Pettersson-Yeo et al., 2011<sup>7</sup>), bipolar disorder (BIP; e.g. Syan et al., 2018<sup>8</sup>),  
54 autism spectrum disorders (ASD; e.g. Hong et al., 2019<sup>9</sup>), attention-deficit hyperactivity disorder (ADHD;  
55 e.g. Gao et al., 2019<sup>10</sup>), major depression (MDD; e.g. Brakowski et al., 2017<sup>11</sup>), post-traumatic stress  
56 disorder (PTSD; e.g. Akiki et al., 2017<sup>12</sup>) and anxiety disorders (ANX; e.g. Xu et al., 2019<sup>13</sup>).

57 Altered brain connectivity in psychiatric disorders might reflect changes in synaptic functioning.  
58 Evidence from induced pluripotent stem cell research shows that mutations relevant to psychiatric  
59 disorders cause synapse deficits<sup>14</sup>, genome-wide association studies (GWAS) of psychiatric disorders  
60 identified various genes involved in synaptic functioning<sup>4,15-17</sup>, and gene expression studies identified  
61 differential expression patterns in synapse related genes in these disorders<sup>18</sup>.

62 While both neuroimaging and genetic studies each have pointed to synaptic alterations in psychiatric  
63 disorders, only a few have specifically tested this hypothesis in an integrated imaging-genetics framework.  
64 A few studies have explored the genetic architecture of functional brain connectivity<sup>19-23</sup>, and studies  
65 assessing polygenic risk scores have indicated links between psychiatric disorders and abnormal brain  
66 connectivity<sup>24,25</sup>. Previous studies also illustrated genetic correlation between various brain imaging  
67 phenotypes and psychiatric disorders that confirm a large degree of shared effect sizes across single  
68 nucleotide polymorphisms (SNPs)<sup>26-28</sup>. However, we still lack a concise map of the overlap in genetic  
69 architecture between psychiatric disorders and the brain functional connectome.

70 Recent evidence from anatomical imaging suggests a distributed nature of genetic effects on the brain,  
71 calling for tools that take a multivariate approach to imaging genetics, beyond univariate genome-wide  
72 association studies of single brain phenotypes<sup>29</sup>. We hypothesized that such distributed nature of the  
73 genetic effects is also observable in functional imaging given the functional interplay of brain regions  
74 (nodes) in the connectome. A multivariate approach would perform better at capturing these distributed  
75 effects than conventional univariate GWASs<sup>29</sup>, and we therefore deployed such approach to study the  
76 genetic architecture of functional brain connectivity – here defined as the partial correlation between  
77 temporal signal of large-scale brain network nodes<sup>30,31</sup> using data from the UK Biobank. Based on  
78 previous research pointing at dysconnectivity in psychiatric disorders, we expected that there is  
79 overlapping genetic architecture between the functional connectome and the disorders that can be captured

80 using our multivariate approach. We therefore assessed genetic overlap between the connectome and  
81 seven major psychiatric disorders (ADHD, ANX, ASD, BIP, MDD, PTSD and SCZ; Supplementary  
82 Table 1).

83

#### 84 **Results**

85 We performed two multivariate GWAS using the Multivariate Omnibus Statistical Test (MOSTest)<sup>29</sup>, one  
86 based on connectivity of 210 connections between 21 network nodes defined for the whole brain  
87 functional connectome, and one based on temporal signal variance in the respective nodes. The main  
88 analysis included data from 30,701 white British individuals aged 45-82 years (52.8% females) and  
89 replication analysis included a cross-ethnic sample of 8954 individuals aged 45-83 years (53.0% females).  
90 The Miami plots in Figure 1A illustrate the genetic associations calculated using MOSTest, and for  
91 comparison the associations identified using the traditional min-p approach, which takes the smallest p-  
92 value across univariate GWASs. Supplementary Fig. 2 depicted corresponding QQ-Plots. MOSTest  
93 identified 15 genetic loci significantly ( $P < 5e-8$ ) associated with functional brain connectivity (FC) and 5  
94 loci significantly associated with node variance, whereas the min-p approach only identified 2 loci for FC  
95 and 3 loci for node variance. Seven of 15 FC loci (47%) and 2 of 5 node variance loci (40%) were  
96 replicated at nominal p-value in the cross-ethnic independent replication sample (See Suppl. Fig. 2). Four  
97 of the five loci identified for node variance were also present for FC, in line with the phenotypic  
98 relationship between the two. The bottom row in Figure 1A shows individual univariate p-values for the  
99 MOSTest-discovered loci, illustrating that the univariate approach is only good at capturing strong effects  
100 (e.g. locus 3 for FC), yet fails to discover loci with enriched signal across brain phenotypes. This also  
101 indicates that signal captured by the min-p approach reflects mostly the effect of individual phenotypes,  
102 rather than the combined signal as captured by MOSTest. Figure 1B and corresponding Suppl. Figure 3  
103 further illustrate the distributed nature of effects across the brain, where a given locus shows differential  
104 patterns of regional SNP effects. Finally, genetic correlation analysis of univariate node variance GWAS  
105 illustrated strong genetic correlations between different brain network nodes, largely in line with the  
106 phenotypic correlations observed when correlating the fMRI time series, and adding further support to a  
107 distributed nature of effects in fMRI-based connectomics (Suppl. Fig. 4).

108

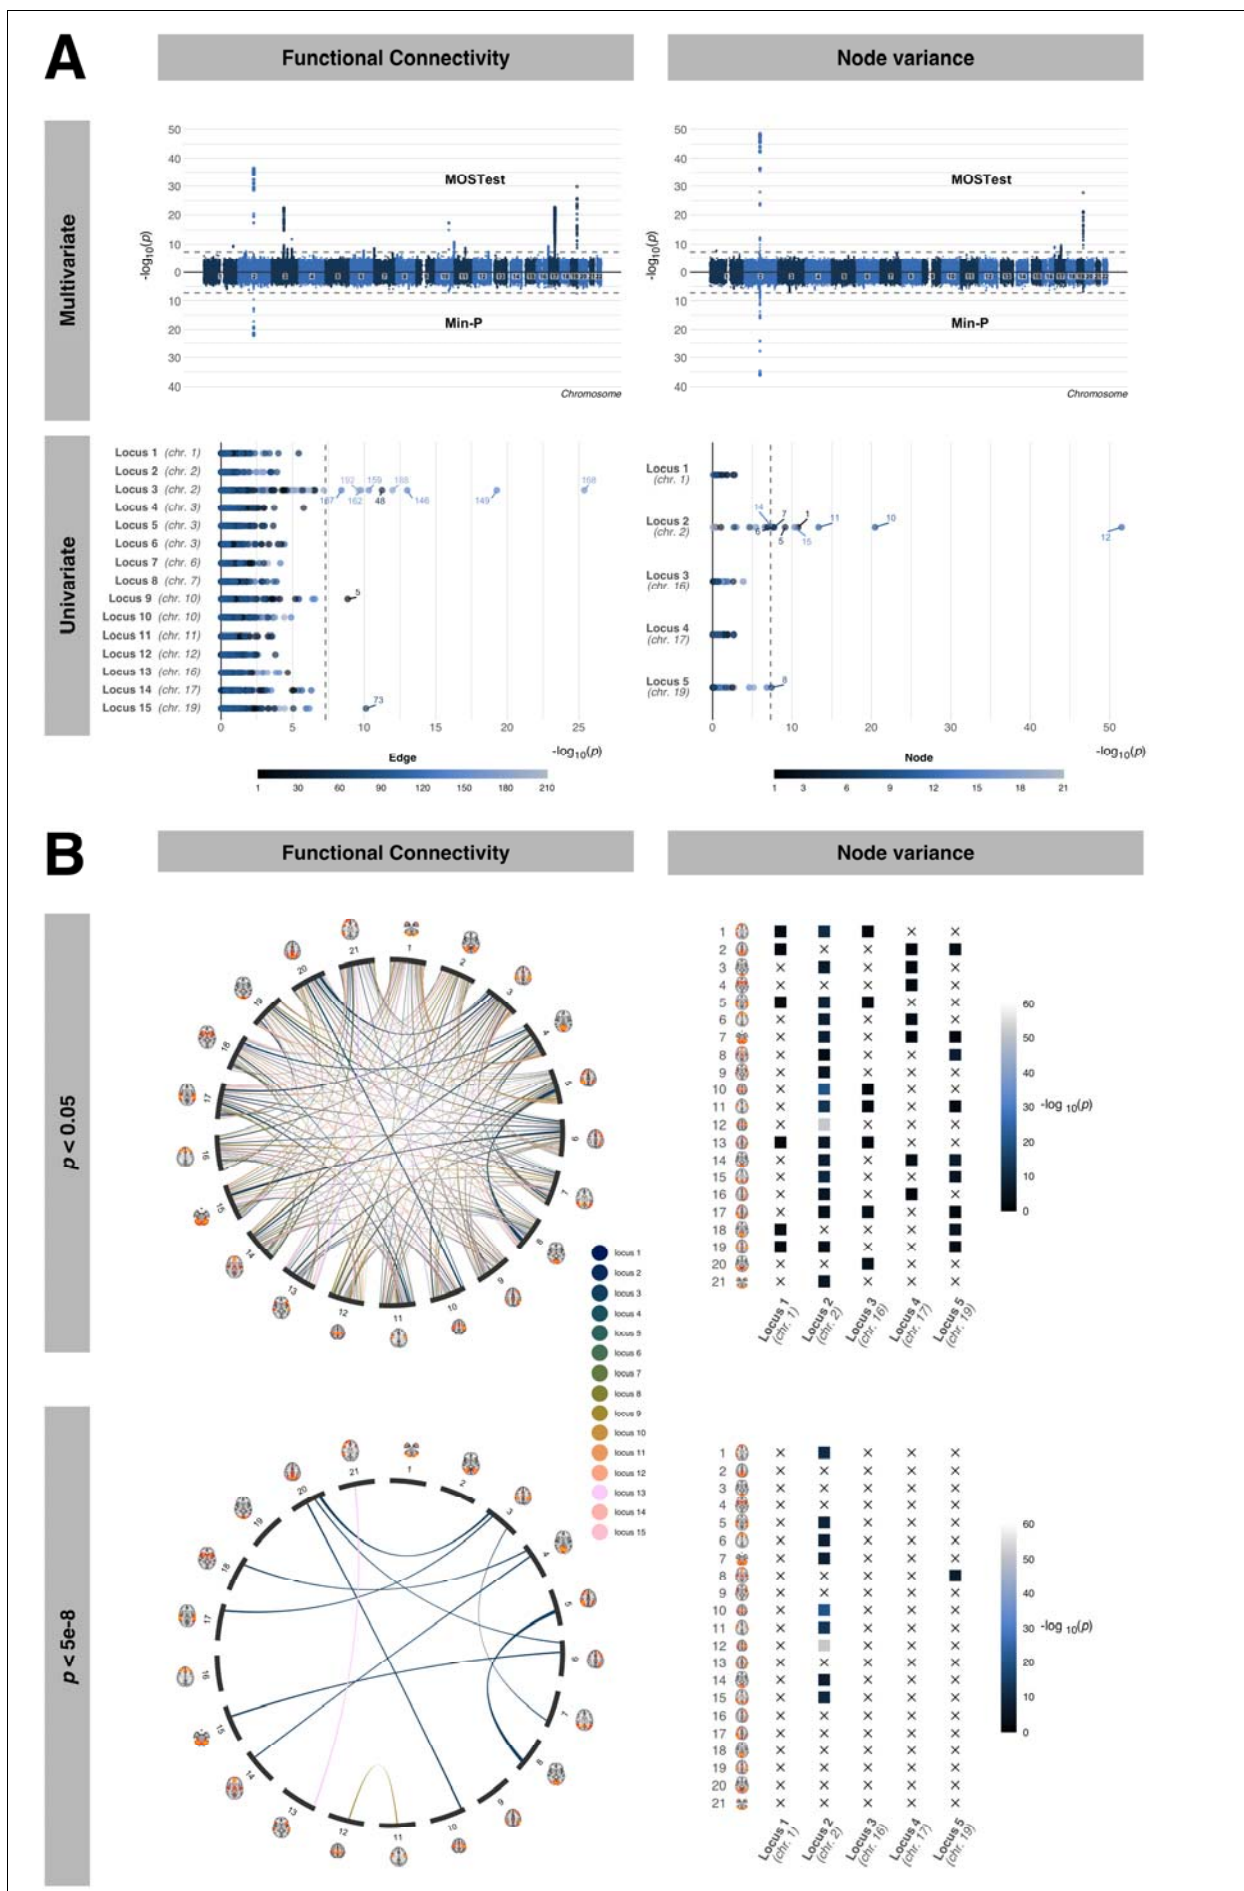

**Figure 1. Multivariate and univariate architecture of the brain functional connectome.** A) The first column of the figure illustrates the results for functional connectivity, the second column for node variance. The first row of panel A shows the Miami plots with the multivariate GWAS results from the MOSTest approach in the top, and the results from the traditional min-p approach at the bottom. The second row shows for each locus identified by MOSTest, the univariate p-values of the lead SNP in each locus. A majority of loci identified by the multivariate approach were not detected via the univariate approach. B) This panel show the univariate  $p$ -values for the lead SNPs of the significant loci identified by MOSTest. The first row of the panel shows the SNPs significant at nominal  $p$ -value ( $P < 0.05$ ), the second row shows the significant SNPs at  $P < 5e-8$ . In the first column (FC) the non-significant SNPs are hidden. The lead SNPs from different loci are identified by a different color. Lead SNP associated with FC locus 3 were most often significant. The patterns are visualized in more detail in Suppl. Figure 3. In the second column (node variance), non-significant SNPs are denoted by a cross and color indicates the  $p$ -value for the significant nodes. Most significant SNPs were part of node variance locus 2.

109  
110 To complement the multivariate stream, we further analyzed the univariate GWAS for each  
111 connection in the full brain network and for each node variance separately. Figure 2 depicts the SNP-  
112 based heritability for each connection (panel A) and for each node (panel B). SNP-based heritability  
113 ranged from 0.14% to 10.58% for brain connectivity (for 7 connections it could not be computed) and 137  
114 out of 210 connections had a heritability above 1.96 times its standard error, indicating genetic signal<sup>32</sup>.  
115 The connection with the highest heritability was the connection between nodes reflecting activity in the  
116 prefrontal cortex (network 16) and the default mode network (network 14). We also observed high  
117 heritability estimates between bilateral homologous networks (e.g. network 21 and network 6) or between  
118 networks that involve the default mode network (e.g. network 14 and network 9, network 14 and network  
119 1). Likewise, for node variance SNP-based heritability ranged from 3.92% to 13.64% with all nodes above  
120 1.96 times their standard error, and highest heritability observed for node 9 (default mode network).  
121 Univariate analysis revealed no significant loci for any of the nodes or edges when controlling for the total  
122 number of edges or nodes through Bonferroni correction. The number of significant loci for the  
123 multivariate stream compared to the univariate stream adds further support that the genetic signal is  
124 distributed across the brain functional connectome, allowing us to capitalize on the signal for loci  
125 discovery.  
126

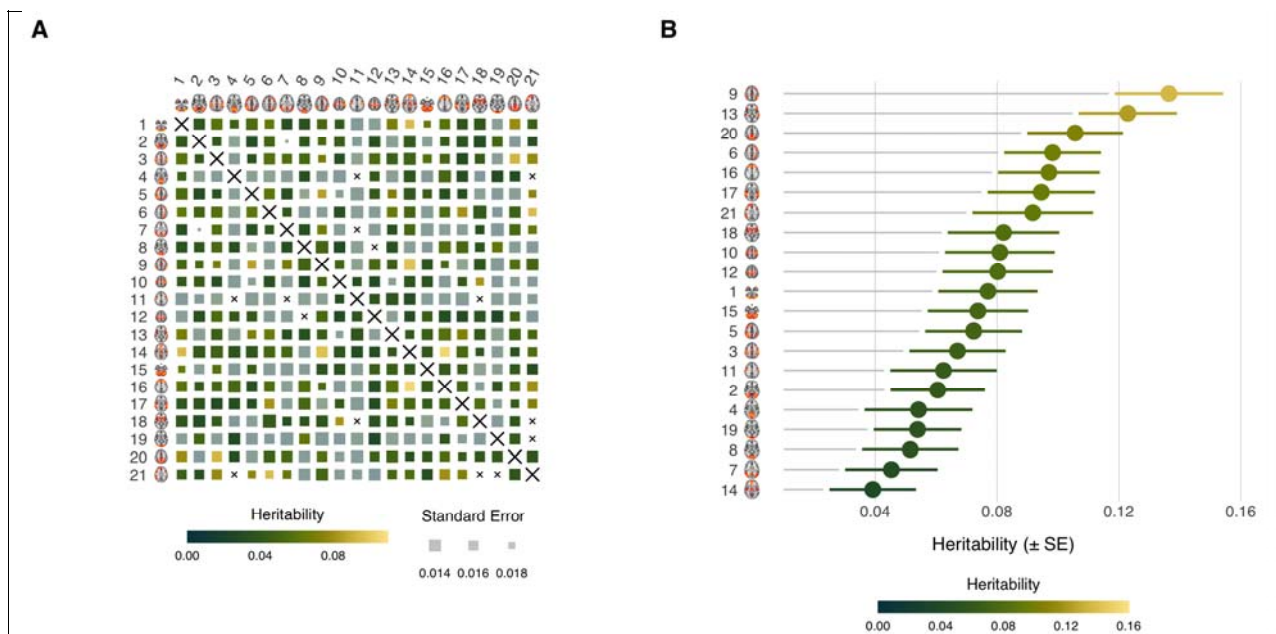

**Figure 2. Heritability across edges and nodes.** Partitioned heritability ( $h^2$ ) across 210 edges (panel A) and 21 nodes (panel B). (A) Upper half and lower halves of the figure are identical. Dark green indicates lowest heritability, bright yellow indicates highest heritability. Edges that did not survive heritability threshold are greyed out. Edges for which heritability could not be calculated are marked with a cross. (B) Color scheme follows panel A and standard errors are depicted as bars

127  
128 Next, we tested for overlap between the two MOSTest-derived genetic profiles (connectivity and  
129 node variance) with seven major psychiatric disorders (ADHD, ASD, ANX, BIP, MD, PTSD, SCZ) using  
130 conjunctive FDR analysis<sup>33</sup>. We found shared loci for six of the seven disorders, namely for ADHD,  
131 ASD, ANX, MD, BIP and SCZ (Fig. 3). By far the largest number of shared loci was implicated for SCZ  
132 (43 for FC, 22 for node variance). We found 6 loci for FC and 1 locus for node variance in ADHD, 5 loci  
133 for FC and 1 locus for node variance in BIP, and 4 loci for FC and 3 loci for node variance in ASD.  
134 Additionally, we found 1 shared locus between FC and MDD, and 1 shared locus between node variance  
135 and ANX. We did not find any shared loci between either FC or node variance and PTSD. Supplementary  
136 Fig. 5 depicts quantile-quantile plots for all genetic overlap analyses.

137 Using Functional Mapping and Annotation of GWAS (FUMA)<sup>34</sup>, we mapped the loci shared  
138 between the connectome and the disorders to a number of genes listed in Suppl. Table 2. Strikingly,  
139 several of the mapped genes are known for their strong roles in synapse functioning. For example, we  
140 mapped BDNF to one of the loci shared between SCZ and FC. BDNF is a major regulator of synaptic  
141 transmission and synaptic plasticity<sup>35</sup>. Another example is NRXN1, found also for SCZ and FC, which is  
142 known for its role in the formation of synaptic contacts<sup>36</sup>. As expected, several of the genes were  
143 previously associated with psychiatric conditions, or with neurodevelopment and other brain-related

## Roelfs et al. | Genetics of the brain functional connectome

144 processes. Utilizing the pathway browser on the identified gene sets<sup>37</sup>, we also found that the mapped  
145 genes were involved in cell signaling and signal transduction, more specifically protein-protein  
146 interactions at the synapses, WNT and NTRK signaling, but also a number of other biological processes  
147 such as chromosome maintenance and mitosis (Supplementary Fig. 6).

148



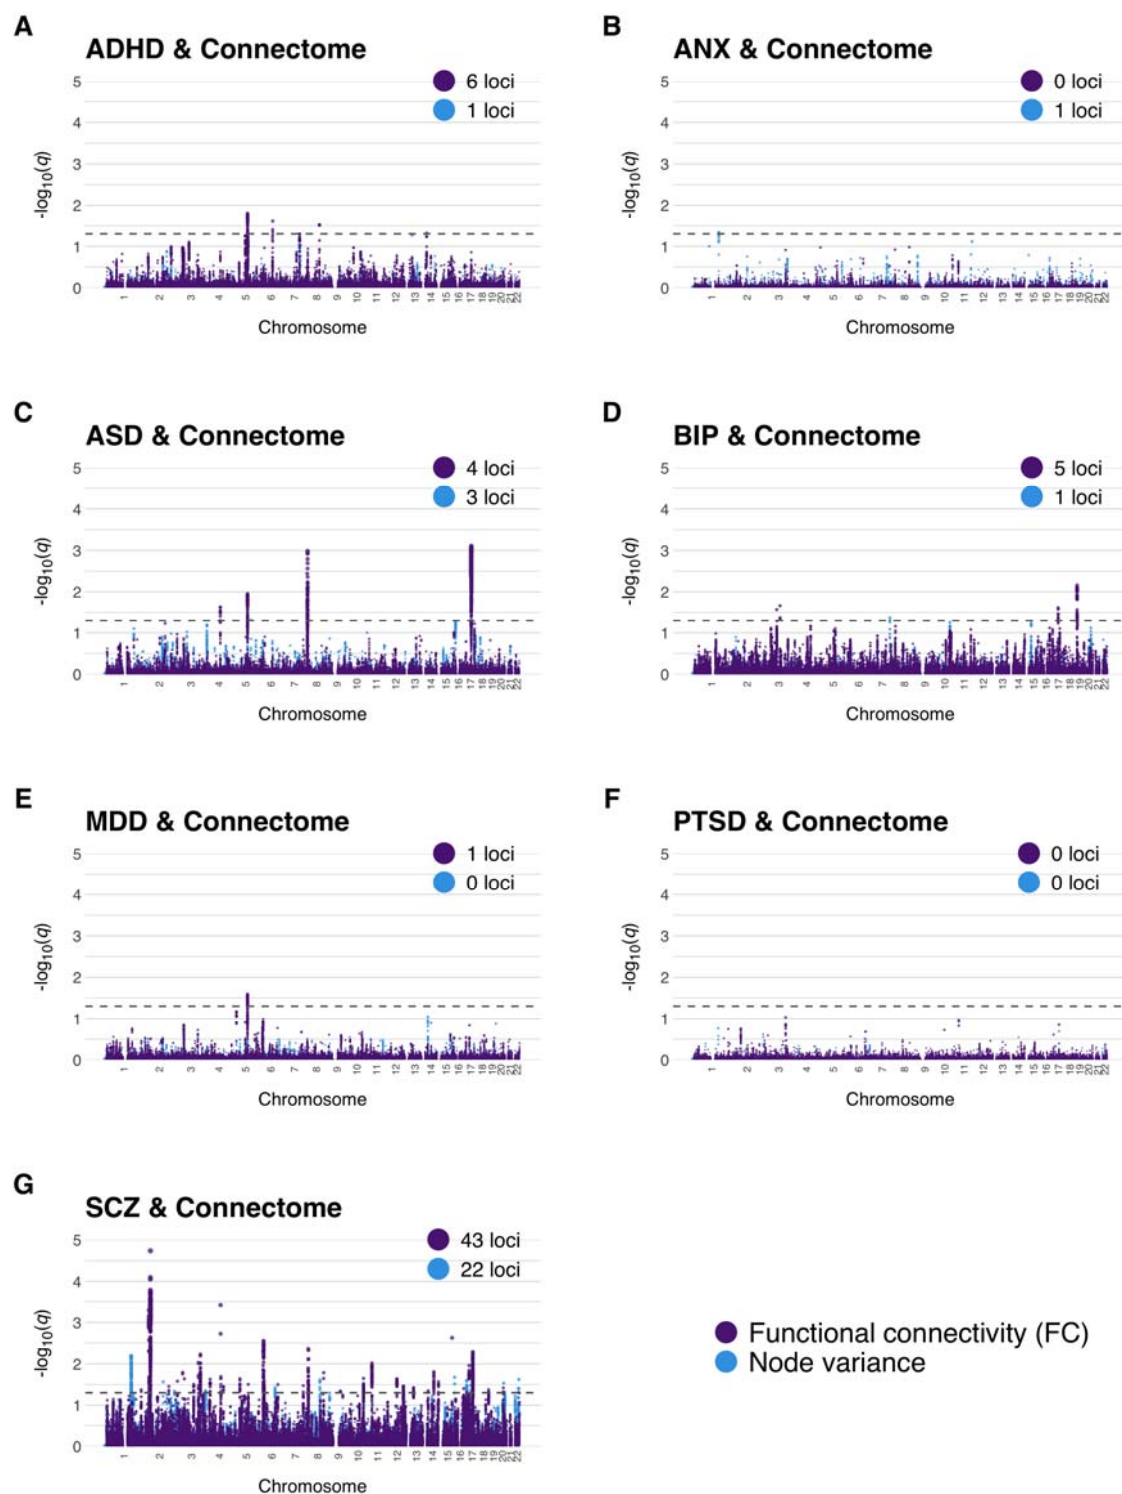

**Figure 3. Manhattan plots illustrating genetic overlap between disorders and the multivariate functional brain phenotypes.** Association strength per locus is depicted as q-value from the conjunctive FDR analysis<sup>33</sup>. Values for FC and node variance are shown in the same figure with separate colors.

Roelfs et al. | Genetics of the brain functional connectome

149  
150           In addition to the conjunctive FDR analyses, we also calculated genetic correlation between  
151 each connection or node surviving our pre-defined threshold of 1.96 times its SE, and the seven  
152 psychiatric disorders. Figure 4A illustrates that genetic correlation was generally low for the connectome  
153 and no connection survived after correcting for all 7 disorders and all connections. When only correcting  
154 for the number of connections but not for the number of disorders, we found a single significant  
155 connection for schizophrenia, which was the link between the auditory cortex and the thalamus ( $r_g =$   
156  $0.2452$ ,  $p_{\text{BONF}} = 0.0137$ ). For node variance, we also found one significant association when correcting for  
157 all disorders and nodes, specifically between SCZ and variance in the tempo-parietal network ( $r_g = 0.2171$ ,  
158  $p_{\text{BONF}} = 3.9\text{e-}06$ ).  
159

Roelfs et al. | Genetics of the brain functional connectome

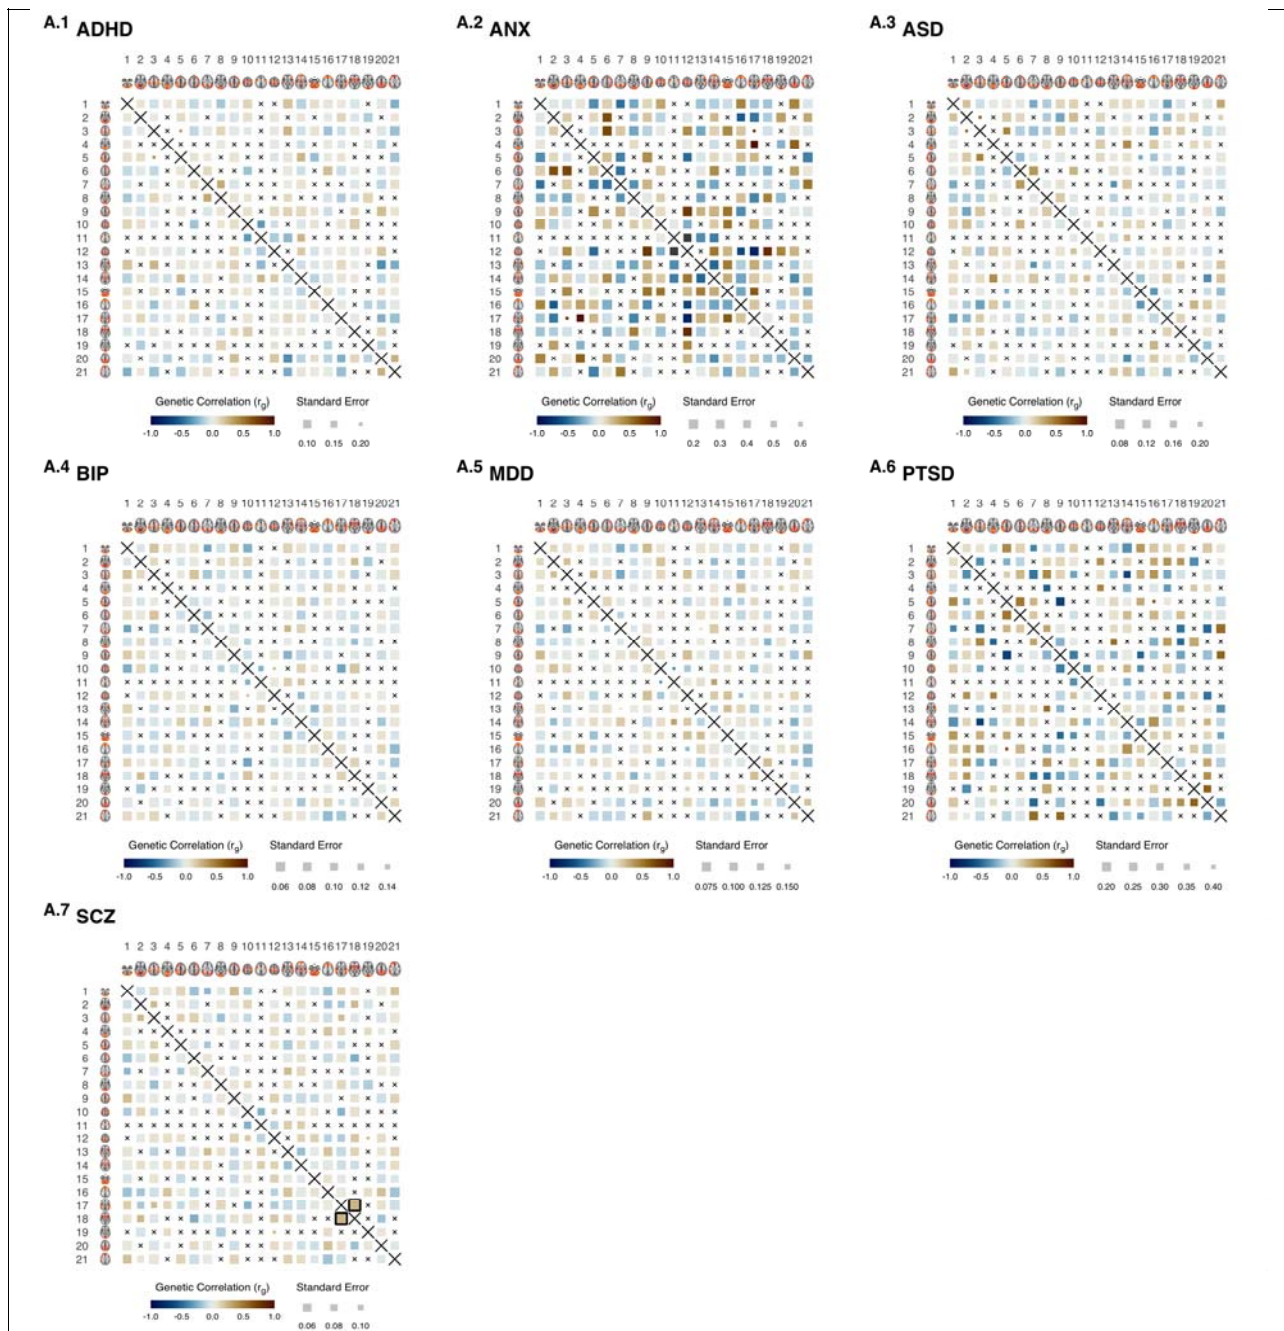



represents the standard error. Edges with a heritability below 1.96 its standard error were not considered in the analysis and marked with a black cross. Among all disorders, only one edge marked with a black border was significant for SCZ after correcting for the number of edges (210), whereas none was significant when correcting for the number of edges and the number of disorders. Upper and lower half of each matrix are identical. (B) Genetic correlation analysis at the node level. Significant genetic correlations within a psychiatric disorder are indicated with a white asterisk when correcting for the number of nodes, whereas a green asterisk indicates significance when correcting for both, the number of nodes and the number of disorders. The latter stringent correction was surpassed for temporal variance of the fronto-parietal node and SCZ.

160

## 161 **Discussion**

162 Taken together, our study provided insight into the shared genetic architecture between measures of the  
163 brain functional connectome and common psychiatric disorders. Deploying multivariate genetic analyses  
164 of fMRI data from more than 30,000 individuals allowed us to capitalize on the distributed nature of  
165 genetic variation across the interconnected whole brain network to discover novel connectome-associated  
166 variants beyond what can be discovered using standard univariate approaches. Our analyses pinpointed a  
167 number of gene variants overlapping between the connectome and psychiatric disorders, where several of  
168 the corresponding mapped genes are known for their involvement with synapse formation and  
169 functioning.

170 We used two measures of the brain functional connectome – the 210 temporal correlations of brain  
171 signal from 21 nodes as measures of functional brain connectivity as well as temporal signal variation of  
172 these 21 network nodes. Given the interconnectedness of the connectome, we hypothesized that many  
173 connections or nodes would have overlapping genetic signatures. Indeed, our results illustrate that the  
174 genetic architecture of brain function is distributed across the brain. Our deployed multivariate approach  
175 successfully leveraged this pleiotropy for discovery, revealing a variety of genetic effects that would not  
176 have been discovered with the standard univariate GWAS approach, including the commonly used min-p  
177 approach which identifies the minimum p-value across univariate GWASs. We observed that the  
178 significant lead SNPs from MOSTest were often not significantly associated with the univariate measure.  
179 This demonstrates that using multivariate genetic analysis can be valuable to complement the univariate  
180 approach in settings like brain imaging where the signal is largely distributed. MOSTest is to some degree  
181 dependent on granularity as also previously shown<sup>38</sup> which may explain why MOSTest identified more  
182 loci for functional connectivity than for node variance, although p-values were generally lower in node  
183 variance compared to functional connectivity.. For both, node variance and connectivity the multivariate  
184 approach increased discovery compared to standard approaches, yet different parcellations may yield even  
185 further discoveries in future research.

## Roelfs et al. | Genetics of the brain functional connectome

186 From our multivariate signatures of the connectome, we were able to identify a number of shared loci  
187 with psychiatric disorders through conjunctive FDR. The strongest degree of overlap was implied for  
188 SCZ yet all other psychiatric disorders apart from PTSD showed some degree of overlap as well, in  
189 particular with connectivity. Several synapse-related genes were among the overlapping genes, including  
190 some involved in the neurodevelopmental formation of synapses. This is particularly intriguing given that  
191 many psychiatric disorders are conceptualized as neurodevelopmental disorders even if they are typically  
192 diagnosed in adulthood. Further, many disorders are conceptualized as disorders of brain dysconnectivity,  
193 as initially proposed for schizophrenia<sup>39</sup>. This is now established across various disorders<sup>40</sup> and our results  
194 provide further evidence from the genetics end.

195 We provided univariate analyses in addition to the multivariate stream and showed a map of genetic  
196 correlations between connectivity, node variance and psychiatric disorders. Only a few edges were  
197 significant after correcting for multiple testing. With most stringent correction applied, we corrected for  
198 the number of comparisons in the network (210 edges / 21 nodes) and the number of disorders (7) and  
199 found that variance in the tempo-parietal node was associated with SCZ. Given this high level of  
200 stringency, we also reported results when not additionally controlling for the number of disorders and  
201 found a genetic association between SCZ and an auditory-thalamic edge. While this is a highly interesting  
202 observation in the light of auditory hallucinations observed in SCZ, the results need replication in  
203 independent data given that it only survived partial multiple-testing adjustment.

204 An important caveat to note is that despite the large sample sizes, only a few edges were significantly  
205 associated with a particular psychiatric disorder in the univariate analyses. These results underline the  
206 distributed nature of the genetic effects across the brain and highlight the importance of large samples.  
207 While the GWASs on the functional connectivity all contained the same number of individuals ( $n =$   
208 30,701), the size of the GWAS for each psychiatric disorder appeared to contribute to the power to detect  
209 genetic overlap. Therefore it is possible that more genetic overlap can be detected with future releases of  
210 psychiatric disorders summary statistics that are based on larger samples. Furthermore, temporal signal  
211 variance at the node level showed both larger heritability and effect sizes than edge functional  
212 connectivity. This may be partly explained by the granularity of the connectivity measure, its partial  
213 correlation account for all other edges in the network, or a better representation of the nodes across  
214 individuals compared to the potentially highly individualized network configurations<sup>41,42</sup>, yet it may also  
215 imply that functional connectivity is less strongly associated with psychiatric disorders than node  
216 variance. At the phenotypic level node variance has been associated with psychiatric disorders, with effect  
217 sizes comparable to connectivity<sup>43-45</sup>. Given that our genetic analyses often imply similar genes for node-  
218 level and connectivity-level, the underlying sources may align despite differences in current association  
219 effect sizes.

220 In conclusion, we here revealed a distributed nature of genetic effects on brain function and  
221 integration, and identified a number of genetic loci associated with key properties of the brain functional  
222 connectome. Further, we revealed a large degree of genetic overlap between multivariate measures of the  
223 brain functional connectome and a number of psychiatric disorders with genes pointing at synaptic  
224 plasticity. This may help further disentangle the complex biological underpinnings of psychiatric disorders  
225 and provide a bridge between functional connectivity alterations and genetic variations in patients. There  
226 is a need for follow-up experimental studies building on the discovered loci to disentangle the biological  
227 mechanisms.

228

## 229 **References**

230

- 231 1. Anttila, V. *et al.* Analysis of shared heritability in common disorders of the brain. *Science* **360**,  
232 eaap8757 (2018).
- 233 2. Fullerton, J. M. & Nurnberger, J. I. Polygenic risk scores in psychiatry: Will they be useful for  
234 clinicians? *F1000Research* **8**, (2019).
- 235 3. Smoller, J. W. *et al.* Psychiatric genetics and the structure of psychopathology. *Mol. Psychiatry* **24**,  
236 409–420 (2019).
- 237 4. Sullivan, P. F. & Geschwind, D. H. Defining the Genetic, Genomic, Cellular, and Diagnostic  
238 Architectures of Psychiatric Disorders. *Cell* **177**, 162–183 (2019).
- 239 5. Vos, T. *et al.* Global burden of 369 diseases and injuries in 204 countries and territories, 1990–2019: a  
240 systematic analysis for the Global Burden of Disease Study 2019. *The Lancet* **396**, 1204–1222 (2020).
- 241 6. Paulus, M. P. & Thompson, W. K. The Challenges and Opportunities of Small Effects: The New  
242 Normal in Academic Psychiatry. *JAMA Psychiatry* **76**, 353–354 (2019).
- 243 7. Pettersson-Yeo, W., Allen, P., Benetti, S., McGuire, P. & Mechelli, A. Dysconnectivity in  
244 schizophrenia: where are we now? *Neurosci. Biobehav. Rev.* **35**, 1110–1124 (2011).
- 245 8. Syan, S. K. *et al.* Resting-state functional connectivity in individuals with bipolar disorder during  
246 clinical remission: a systematic review. *J. Psychiatry Neurosci. JPN* **43**, 298–316 (2018).
- 247 9. Hong, S.-J. *et al.* Atypical functional connectome hierarchy in autism. *Nat. Commun.* **10**, 1022 (2019).
- 248 10. Gao, Y. *et al.* Impairments of large-scale functional networks in attention-deficit/hyperactivity  
249 disorder: a meta-analysis of resting-state functional connectivity. *Psychol. Med.* **49**, 2475–2485  
250 (2019).
- 251 11. Brakowski, J. *et al.* Resting state brain network function in major depression - Depression  
252 symptomatology, antidepressant treatment effects, future research. *J. Psychiatr. Res.* **92**, 147–159  
253 (2017).

Roelfs et al. | Genetics of the brain functional connectome

- 254 12. Akiki, T. J., Averill, C. L. & Abdallah, C. G. A Network-Based Neurobiological Model of PTSD:  
255 Evidence From Structural and Functional Neuroimaging Studies. *Curr. Psychiatry Rep.* **19**, 81 (2017).
- 256 13. Xu, J. *et al.* Anxious brain networks: A coordinate-based activation likelihood estimation meta-  
257 analysis of resting-state functional connectivity studies in anxiety. *Neurosci. Biobehav. Rev.* **96**, 21–  
258 30 (2019).
- 259 14. Wen, Z. *et al.* Synaptic dysregulation in a human iPS cell model of mental disorders. *Nature* **515**,  
260 414–418 (2014).
- 261 15. Devor, A. *et al.* Genetic evidence for role of integration of fast and slow neurotransmission in  
262 schizophrenia. *Mol. Psychiatry* **22**, 792–801 (2017).
- 263 16. Howard, D. M. *et al.* Genome-wide association study of depression phenotypes in UK Biobank  
264 identifies variants in excitatory synaptic pathways. *Nat. Commun.* **9**, 1470 (2018).
- 265 17. Ripke, S., Walters, J. T. & O’Donovan, M. C. Mapping genomic loci prioritises genes and implicates  
266 synaptic biology in schizophrenia. *medRxiv* 2020.09.12.20192922 (2020)  
267 doi:10.1101/2020.09.12.20192922.
- 268 18. Lopez de Lara, C. *et al.* Implication of synapse-related genes in bipolar disorder by linkage and gene  
269 expression analyses. *Int. J. Neuropsychopharmacol.* **13**, 1397–1410 (2010).
- 270 19. Aurina Arnatkeviciute, Ben Fulcher, Mark Bellgrove, & Alex Fornito. Where the Genome Meets the  
271 Connectome: Understanding How Genes Shape Human Brain Connectivity. *PsyArXiv* (2021)  
272 doi:<https://doi.org/10.31234/osf.io/hqgz7>.
- 273 20. Barabási, D. L. & Barabási, A.-L. A Genetic Model of the Connectome. *Neuron* **105**, 435-445.e5  
274 (2020).
- 275 21. Fornito, A. *et al.* Genetic influences on cost-efficient organization of human cortical functional  
276 networks. *J. Neurosci. Off. J. Soc. Neurosci.* **31**, 3261–3270 (2011).
- 277 22. Smith, S. M. *et al.* An expanded set of genome-wide association studies of brain imaging phenotypes  
278 in UK Biobank. *Nat. Neurosci.* (2021) doi:10.1038/s41593-021-00826-4.
- 279 23. Yang, Z. *et al.* Genetic and Environmental Contributions to Functional Connectivity Architecture of  
280 the Human Brain. *Cereb. Cortex N. Y. N 1991* **26**, 2341–2352 (2016).
- 281 24. Cao, H., Zhou, H. & Cannon, T. D. Functional connectome-wide associations of schizophrenia  
282 polygenic risk. *Mol. Psychiatry* (2020) doi:10.1038/s41380-020-0699-3.
- 283 25. Miller, D. R. *et al.* Posttraumatic stress disorder symptom severity is associated with reduced default  
284 mode network connectivity in individuals with elevated genetic risk for psychopathology. *Depress.*  
285 *Anxiety* **34**, 632–640 (2017).
- 286 26. Hibar, D. P. *et al.* Cortical abnormalities in bipolar disorder: an MRI analysis of 6503 individuals  
287 from the ENIGMA Bipolar Disorder Working Group. *Mol. Psychiatry* **23**, 932–942 (2018).



Roelfs et al. | Genetics of the brain functional connectome

- 288 27. Walton, E. *et al.* Exploration of Shared Genetic Architecture Between Subcortical Brain Volumes and  
289 Anorexia Nervosa. *Mol. Neurobiol.* **56**, 5146–5156 (2019).
- 290 28. Zhao, B. *et al.* Large-scale GWAS reveals genetic architecture of brain white matter microstructure  
291 and genetic overlap with cognitive and mental health traits (n = 17,706). *Mol. Psychiatry* (2019)  
292 doi:10.1038/s41380-019-0569-z.
- 293 29. van der Meer, D. *et al.* Understanding the genetic determinants of the brain with MOSTest. *Nat.*  
294 *Commun.* **11**, 3512 (2020).
- 295 30. Smith, S. M. *et al.* Network modelling methods for FMRI. *NeuroImage* **54**, 875–891 (2011).
- 296 31. Smitha, K. A. *et al.* Resting state fMRI: A review on methods in resting state connectivity analysis  
297 and resting state networks. *Neuroradiol. J.* **30**, 305–317 (2017).
- 298 32. Shi, H., Mancuso, N., Spendlove, S. & Pasaniuc, B. Local Genetic Correlation Gives Insights into the  
299 Shared Genetic Architecture of Complex Traits. *Am. J. Hum. Genet.* **101**, 737–751 (2017).
- 300 33. Andreassen, O. A. *et al.* Improved detection of common variants associated with schizophrenia and  
301 bipolar disorder using pleiotropy-informed conditional false discovery rate. *PLoS Genet* **9**, e1003455  
302 (2013).
- 303 34. Watanabe, K., Taskesen, E., van Bochoven, A. & Posthuma, D. Functional mapping and annotation of  
304 genetic associations with FUMA. *Nat. Commun.* **8**, 1826 (2017).
- 305 35. Dean, C. *et al.* Synaptotagmin-IV modulates synaptic function and long-term potentiation by  
306 regulating BDNF release. *Nat. Neurosci.* **12**, 767–776 (2009).
- 307 36. Dean, C. *et al.* Neurexin mediates the assembly of presynaptic terminals. *Nat. Neurosci.* **6**, 708–716  
308 (2003).
- 309 37. Jassal, B. *et al.* The reactome pathway knowledgebase. *Nucleic Acids Res.* **48**, D498–D503 (2020).
- 310 38. Shadrin, A. A. *et al.* Multivariate genome-wide association study identifies 780 unique genetic loci  
311 associated with cortical morphology. *bioRxiv* 2020.10.22.350298 (2021)  
312 doi:10.1101/2020.10.22.350298.
- 313 39. Friston, K., Brown, H. R., Siemerkus, J. & Stephan, K. E. The dysconnection hypothesis (2016).  
314 *Schizophr. Res.* **176**, 83–94 (2016).
- 315 40. van den Heuvel, M. P. & Sporns, O. A cross-disorder connectome landscape of brain dysconnectivity.  
316 *Nat. Rev. Neurosci.* **20**, 435–446 (2019).
- 317 41. Finn, E. S. *et al.* Functional connectome fingerprinting: identifying individuals using patterns of brain  
318 connectivity. *Nat. Neurosci.* **18**, 1664–1671 (2015).
- 319 42. Kaufmann, T. *et al.* Delayed stabilization and individualization in connectome development are  
320 related to psychiatric disorders. *Nat. Neurosci.* **20**, 513–515 (2017).
- 321 43. Kaufmann, T. *et al.* Disintegration of Sensorimotor Brain Networks in Schizophrenia. *Schizophr.*  
322 *Bull.* **41**, 1326–1335 (2015).

Roelfs et al. | Genetics of the brain functional connectome

- 323 44. Lynall, M.-E. *et al.* Functional connectivity and brain networks in schizophrenia. *J. Neurosci. Off. J.*  
324 *Soc. Neurosci.* **30**, 9477–9487 (2010).
- 325 45. Rolls, E. T., Cheng, W. & Feng, J. Brain dynamics: the temporal variability of connectivity, and  
326 differences in schizophrenia and ADHD. *Transl. Psychiatry* **11**, 70 (2021).
- 327 46. Bycroft, C. *et al.* The UK Biobank resource with deep phenotyping and genomic data. *Nature* **562**,  
328 203–209 (2018).
- 329 47. Bycroft, C. *et al.* Genome-wide genetic data on 500,000 UK Biobank participants. *bioRxiv* 166298  
330 (2017) doi:10.1101/166298.
- 331 48. Jenkinson, M., Beckmann, C. F., Behrens, T. E. J., Woolrich, M. W. & Smith, S. M. FSL. *20 YEARS*  
332 *FMRI* **62**, 782–790 (2012).
- 333 49. Smith, S. M. *et al.* Advances in functional and structural MR image analysis and implementation as  
334 FSL. *NeuroImage* **23 Suppl 1**, S208-219 (2004).
- 335 50. Griffanti, L. *et al.* ICA-based artefact removal and accelerated fMRI acquisition for improved resting  
336 state network imaging. *NeuroImage* **95**, 232–247 (2014).
- 337 51. Salimi-Khorshidi, G. *et al.* Automatic denoising of functional MRI data: combining independent  
338 component analysis and hierarchical fusion of classifiers. *NeuroImage* **90**, 449–468 (2014).
- 339 52. Beckmann, C. F. & Smith, S. M. Probabilistic independent component analysis for functional  
340 magnetic resonance imaging. *IEEE Trans. Med. Imaging* **23**, 137–152 (2004).
- 341 53. Smith, S. M. *et al.* Functional connectomics from resting-state fMRI. *Spec. Issue Connect.* **17**, 666–  
342 682 (2013).
- 343 54. Kaufmann, T. *et al.* Task modulations and clinical manifestations in the brain functional connectome  
344 in 1615 fMRI datasets. *NeuroImage* **147**, 243–252 (2017).
- 345 55. Demontis, D. *et al.* Discovery of the first genome-wide significant risk loci for attention  
346 deficit/hyperactivity disorder. *Nat. Genet.* **51**, 63–75 (2019).
- 347 56. Otowa, T. *et al.* Meta-analysis of genome-wide association studies of anxiety disorders. *Mol.*  
348 *Psychiatry* **21**, 1391–1399 (2016).
- 349 57. Grove, J. *et al.* Identification of common genetic risk variants for autism spectrum disorder. *Nat.*  
350 *Genet.* **51**, 431–444 (2019).
- 351 58. Stahl, E. A. *et al.* Genome-wide association study identifies 30 loci associated with bipolar disorder.  
352 *Nat. Genet.* **51**, 793–803 (2019).
- 353 59. Wray, N. R. *et al.* Genome-wide association analyses identify 44 risk variants and refine the genetic  
354 architecture of major depression. *Nat. Genet.* **50**, 668–681 (2018).
- 355 60. Duncan, L. E. *et al.* Largest GWAS of PTSD (N=20□070) yields genetic overlap with schizophrenia  
356 and sex differences in heritability. *Mol. Psychiatry* **23**, 666–673 (2018).

Roelfs et al. | Genetics of the brain functional connectome

- 357 61. Pardiñas, A. F. *et al.* Common schizophrenia alleles are enriched in mutation-intolerant genes and in  
358 regions under strong background selection. *Nat. Genet.* **50**, 381–389 (2018).
- 359 62. Finucane, H. K. *et al.* Partitioning heritability by functional annotation using genome-wide  
360 association summary statistics. *Nat. Genet.* **47**, 1228–1235 (2015).
- 361 63. Bulik-Sullivan, B. K. *et al.* LD Score regression distinguishes confounding from polygenicity in  
362 genome-wide association studies. *Nat Genet* **47**, 291–5 (2015).
- 363 64. Bulik-Sullivan, B. *et al.* An atlas of genetic correlations across human diseases and traits. *Nat Genet*  
364 **47**, 1236–41 (2015).
- 365 65. Lee, J. J., McGue, M., Iacono, W. G. & Chow, C. C. The accuracy of LD Score regression as an  
366 estimator of confounding and genetic correlations in genome-wide association studies. *Genet.*  
367 *Epidemiol.* **42**, 783–795 (2018).
- 368 66. Koopmans, F. *et al.* SynGO: An Evidence-Based, Expert-Curated Knowledge Base for the Synapse.  
369 *Neuron* **103**, 217-234.e4 (2019).
- 370

371 **Methods**

372  
373 *Sample and exclusion criteria*  
374 We accessed resting state fMRI data from the UK Biobank<sup>46</sup>, a large-scale resource of imaging, genetics,  
375 and other biological and psychological data (access with permission no. 27412). All participants provided  
376 signed informed consent before inclusion in the study. The UK Biobank was approved by the National  
377 Health Service National Research Ethics Service (ref. 11/NW/0382). We selected data from individuals  
378 with White British ancestry, identified based on the genetic clustering performed by the UK Biobank  
379 team<sup>47</sup>. Data of all eligible participants were included for the main analysis in November 2020 and we did  
380 not exclude individuals based on a diagnosis. The resulting sample comprised data of 30.701 individuals  
381 with a mean age of 64.24 years (SD: 7.50, range: 45-82; 52.8% females). Additional data became  
382 available afterwards and was partly used for replication (see Replication section).

383  
384 *Image acquisition and pre-processing*

385 Data had been acquired by the UK Biobank study team<sup>46</sup>. The fMRI images were collected on two  
386 identical 3T Siemens Magnetom Skyra scanners in the UK with a 32 channel head coil (Siemens  
387 Healthcare GmbH, Erlangen, Germany). Data was recorded using a gradient-echo echo planar imaging  
388 sequence with x8 multislice acceleration (TR: 0.735s, TE: 39ms, FOV: 88x88x64 matrix, FA: 52°) with a  
389 voxel size of 2.4x2.4x2.4mm. One fMRI sequence took approximately 6 minutes. The protocol further  
390 included T1 imaging, acquired using a MPRAGE sequence with in-plane acceleration (iPAT) of 2  
391 (resolution: 1mm<sup>3</sup>, FOV: 208x256x256 matrix).

392 Data had been preprocessed by the UK Biobank study team as described in Alfaro-Almagro *et al.*  
393 (2018). Briefly, preprocessing used the FSL pipeline<sup>48,49</sup>, which included unwarping, motion correction  
394 using MC-FLIRT (Jenkinson, Bannister, Brady, & Smith, 2002), and intensity normalization. Artifacts  
395 were removed using ICA and FIX preprocessing<sup>50,51</sup>. The final step was a group ICA using MELODIC<sup>52</sup>  
396 which decomposed the data using independent component analysis into 25 components.

397 We retrieved individual level time series data for each subject and component (output from dual  
398 regression at model order 25). We computed functional brain networks using the FSLNets toolbox<sup>53</sup>. First,  
399 we regressed the time series of four noise components from the time series of the remaining 21  
400 components and subsequently removed those four components. Next, we estimated functional  
401 connectivity (FC) as the regularized partial correlations of the component time series, implementing an  
402 approach developed by Ledoit & Wolf (2012) which performs an automated adjustment of the shrinkage  
403 parameter lambda, as implemented in our earlier work<sup>54</sup>. As the last step, we regressed age, age<sup>2</sup>, sex,  
404 scanner, motion, signal-to-noise ratio (SNR), and the first 20 genetic principal components from the

## Roelfs et al. | Genetics of the brain functional connectome

405 individual connection strengths, residualizing each edge (210 in total) of the partial correlation matrix. In  
406 addition to functional brain connectivity, we also performed an analysis of the variance in signal  
407 amplitude of the 21 components<sup>48</sup>, and performed the same residualisation in this node-level analysis as  
408 described above for the edge level.

409  
410 *Univariate and Multivariate Genome-Wide Analysis*  
411 We performed multivariate and univariate GWAS using the Multivariate Omnibus Statistical Test  
412 (MOSTest)<sup>29</sup>. MOSTest takes as input all univariate test statistics (z-scores) for each SNP, as obtained  
413 through standard association testing with each pre-residualized phenotype, and compares this to test  
414 statistics obtained following a single random permutation of the genotype vector. A multivariate test  
415 statistic is then calculated from this comparison as the Mahalanobis norm, with the probability of the  
416 observed test-statistic being derived from a Chi-square distribution. Further details of the method are  
417 described in Van der Meer et al. (2020). MOSTest returns a multivariate test statistic, where in contrast to  
418 classical univariate GWAS that link a given SNP with a single phenotype, for each SNP the multivariate  
419 association across all included phenotypes is provided. This allowed us to retrieve one multivariate  
420 summary statistic for functional brain connectivity (edge level), and one for node variance (node level). In  
421 addition, we retrieved classical univariate summary statistics for follow-up analyses.

422  
423 *Summary statistics for psychiatric disorders*  
424 We accessed publicly available summary statistics for Attention-Deficit Hyperactivity Disorder  
425 (ADHD)<sup>55</sup>, anxiety disorder (ANX)<sup>56</sup>, autism spectrum disorder (ASD)<sup>57</sup>, bipolar disorder (BIP)<sup>58</sup>, major  
426 depression (MD)<sup>59</sup>, Post-Traumatic Stress Disorder (PTSD)<sup>60</sup>, and schizophrenia (SCZ)<sup>61</sup>. For details, see  
427 Suppl. Fig. 1.

428  
429 *Pleiotropy-informed conjunctive false discovery rate*  
430 Due to the complex and polygenic architecture of our brain phenotypes, we utilized pleiotropy-informed  
431 conjunctive false discovery rate (conjFDR) as implemented in the pleioFDR toolbox<sup>33</sup>. The conjFDR  
432 identifies shared genomic loci between two traits regardless of effect directionality and effect size, making  
433 it ideally suited to compare a multivariate summary statistic from MOSTest (here: FC and variance)  
434 against the summary statistics of a given disorder (here: SCZ, BD, MD, ASD, ADHD, ANX, PTSD).

435  
436 *Linkage Disequilibrium Score Regression*  
437 For the univariate summary statistics, we estimated partitioned heritability<sup>62</sup> and genetic correlation with  
438 LD-score regression using the LDSC toolbox<sup>63</sup>. We also estimated genetic correlation between each edge  
439 and temporal variance in each node with the seven psychiatric disorders using cross-trait LDSC<sup>63-65</sup>. Of

## Roelfs et al. | Genetics of the brain functional connectome

440 note, genetic correlations require effect directions and are thus not applicable to the multivariate summary  
441 statistics derived from MOSTest. We therefore used genetic correlations in connection with univariate  
442 statistics as a complement to the multivariate pipeline.

443  
444 *Gene mapping and annotation*  
445 We used the Functional Mapping and Annotation (FUMA) tool to map loci derived through conjunctional  
446 FDR analyses to genes<sup>34</sup>. We then used the gene list extracted through FUMA to link the genes to  
447 biological processes using the *synGO* toolbox to map synaptic genes<sup>66</sup>, and the *reactome* toolbox to map  
448 the genes to a range of biological processes<sup>37</sup>.

449  
450 *Replication*  
451 To validate the discovered loci, we performed a replication analysis of our two main MOSTest analyses  
452 on a dataset containing all non-White British subjects with available data as well as a new batch of data  
453 (including White British) that arrived after we performed the main analyses. This resulted in a dataset  
454 containing 8954 individuals.

455  
456 *Acknowledgements*  
457 The authors were funded by the Research Council of Norway (#276082 LifespanHealth, #223273  
458 NORMENT, #283798 ERA-NET Neuron SYNSCHIZ, #249795, #298646, #300767), the South-East  
459 Norway Regional Health Authority (2019101, 2019107, and 2020086), and the European Research  
460 Council under the European Union's Horizon2020 Research and Innovation program (ERC Starting Grant  
461 #802998), as well as the Horizon2020 Research and Innovation Action Grant CoMorMent (#847776).  
462 This research has been conducted using the UK Biobank Resource (access code 27412,  
463 <https://www.ukbiobank.ac.uk/>). This work was performed on the TSD (Tjenester for Sensitive Data)  
464 facilities, owned by the University of Oslo, operated and developed by the TSD service group at the  
465 University of Oslo, IT-Department (USIT). Computations were also performed on resources provided by  
466 UNINETT Sigma2 - the National Infrastructure for High Performance Computing and Data Storage in  
467 Norway.

468  
469 *Conflicts of interest*  
470 D.R., D.vd.M., D.A., O.F., R.L., C.C.F., L.T.W. and T.K. declare no conflicts of interest. O.A.A. is a  
471 consultant to HealthLytix and received speakers honorarium from Lundbeck. A.M.D. is a Founder of and  
472 holds equity in CorTechs Labs, Inc, and serves on its Scientific Advisory Board. The terms of this  
473 arrangement have been reviewed and approved by UCSD in accordance with its conflict of interest  
474 policies.

## Roelfs et al. | Genetics of the brain functional connectome

475  
476 *Author contributions*  
477 D.R. and T.K. conceived the study; D.R. analyzed the data with contributions from T.K.; All authors  
478 contributed with conceptual input on methods and/or interpretation of results; D.R. and T.K. wrote the  
479 first draft of the paper and all authors contributed to the final manuscript.  
480  
481 *Data availability*  
482 All data used in this study are part of the publicly available UK Biobank initiative  
483 (<https://www.ukbiobank.ac.uk/>). Summary statistics for the disorders are publicly available through their  
484 respective consortia (Supplementary Table 1). The summary statistics for the multivariate analyses will be  
485 shared on GitHub (<https://www.github.com/norment/open-science>) upon acceptance.  
486  
487 *Code availability*  
488 Code will be made publicly available via GitHub (<https://www.github.com/norment/open-science>) upon  
489 acceptance of the manuscript.  
490
