1 **Genetic overlap between multivariate measures of human functional brain connectivity and**  
2 **psychiatric disorders**

3  
4 Daniel Roelfs<sup>1,\*</sup>, Dennis van der Meer<sup>1,2</sup>, Dag Alnæs<sup>1</sup>, Oleksandr Frei<sup>1,3</sup>, Alexey A. Shadrin<sup>1</sup>, Robert  
5 Loughnan<sup>4</sup>, Chun Chieh Fan<sup>5,6,7</sup>, Anders M. Dale<sup>8,9,10</sup>, Ole A. Andreassen<sup>1,10</sup>, Lars T. Westlye<sup>1,10,11</sup>, Tobias  
6 Kaufmann<sup>1,12,13\*</sup>

7  
8 <sup>1</sup> *NORMENT, Division of Mental Health and Addiction, Oslo University Hospital & Institute of Clinical*  
9 *Medicine, University of Oslo, Oslo, Norway*

10 <sup>2</sup> *School of Mental Health and Neuroscience, Faculty of Health, Medicine, and Life Sciences, Maastricht*  
11 *University, Maastricht, the Netherlands*

12 <sup>3</sup> *Center for Bioinformatics, Department of Informatics, University of Oslo, Oslo, Norway*

13 <sup>4</sup> *Department of Cognitive Science, University of California, San Diego, 9500 Gilman Drive, La Jolla, CA*  
14 *92093 USA*

15 <sup>5</sup> *Population Neuroscience and Genetics Lab, University of California, San Diego, CA, USA.*

16 <sup>6</sup> *Center for Human Development, University of California, San Diego, CA, USA*

17 <sup>7</sup> *Department of Radiology, School of Medicine, University of California, San Diego, CA, USA*

18 <sup>8</sup> *Department of Neurosciences, University of California San Diego, La Jolla, CA 92037, USA*

19 <sup>9</sup> *Center for Multimodal Imaging and Genetics, University of California at San Diego, La Jolla, CA,*  
20 *92037, USA*

21 <sup>10</sup> *K.G. Jebsen Center for Neurodevelopmental disorders, University of Oslo, Oslo, Norway*

22 <sup>11</sup> *Department of Psychology, University of Oslo, Oslo, Norway*

23 <sup>12</sup> *Department of Psychiatry and Psychotherapy, Tübingen Center for Mental Health, University of*  
24 *Tübingen, Germany*

25 <sup>13</sup> *German Center for Mental Health (DZPG), partner site Tübingen, Germany*

26  
27 \* Correspondence: Daniel Roelfs & Tobias Kaufmann, PhD.

28 Email: [daniel.roelfs@medisin.uio.no](mailto:daniel.roelfs@medisin.uio.no), [tobias.kaufmann@medisin.uio.no](mailto:tobias.kaufmann@medisin.uio.no)

29 Postal address: OUS, PO Box 4956 Nydalen, 0424 Oslo, Norway

30 Telephone: +47 23 02 73 50, Fax: +47 23 02 73 33

31

32 Counts: Main: 2732 words | Abstract: 135 words | Figures: 4 | References: 75

33

34 **Abstract**

35 Psychiatric disorders are complex, heritable, and highly polygenic. Supported by findings of abnormalities  
36 in functional magnetic resonance imaging (fMRI) based measures of brain connectivity, current  
37 theoretical and empirical accounts have conceptualized them as disorders of brain connectivity and  
38 dysfunctional integration of brain signaling, however, the extent to which these findings reflect common  
39 genetic factors remains unclear. Here, we performed a multivariate genome-wide association analysis of  
40 fMRI-based functional brain connectivity in a sample of 30,701 individuals from the UK Biobank and  
41 investigated the shared genetic determinants with eight major psychiatric disorders. The analysis revealed  
42 significant genetic overlap between functional brain connectivity and schizophrenia, bipolar disorder,  
43 attention-deficit hyperactivity disorder, autism spectrum disorder, anxiety, and major depression, adding  
44 further genetic support for the dysconnectivity hypothesis of psychiatric disorders and identifying  
45 potential genetic and functional targets for future studies.

## 46 **Introduction**

47 Psychiatric disorders are heritable and highly polygenic<sup>1-4</sup>, and carry a high burden of disease, measured  
48 in years lived with disability<sup>5</sup>. Akin to the polygenic architecture of the disorders, where a number of  
49 variants each contribute with small effects, findings from imaging genetics studies have documented a  
50 distributed pattern of small effects across the genome for brain phenotypes derived from magnetic  
51 resonance imaging (MRI)<sup>6</sup>. Likewise, brain imaging studies of psychiatric disorders have revealed  
52 distributed anatomical and functional alterations across the brain, with a large body of literature indicating  
53 alterations in functional brain connectivity in individuals with a range of psychiatric disorders, including  
54 schizophrenia (SCZ; e.g. Pettersson-Yeo et al., 2011<sup>7</sup>), bipolar disorder (BIP; e.g. Syan et al., 2018<sup>8</sup>),  
55 autism spectrum disorders (ASD; e.g. Hong et al., 2019<sup>9</sup>), attention-deficit hyperactivity disorder (ADHD;  
56 e.g. Gao et al., 2019<sup>10</sup>), major depression (MDD; e.g. Brakowski et al., 2017<sup>11</sup>), post-traumatic stress  
57 disorder (PTSD; e.g. Akiki et al., 2017<sup>12</sup>), anxiety disorders (ANX; e.g. Xu et al., 2019<sup>13</sup>), and anorexia  
58 nervosa (AN, e.g. Fuglset et al., 2016<sup>14</sup>).

59 Altered brain connectivity in psychiatric disorders might reflect changes in synaptic functioning.  
60 Evidence from induced pluripotent stem cell research shows that mutations relevant to psychiatric  
61 disorders cause synapse deficits<sup>15</sup>, genome-wide association studies (GWAS) of psychiatric disorders  
62 identified various genes involved in synaptic functioning<sup>4,16-18</sup>, and gene expression studies identified  
63 differential expression patterns in synapse related genes in these disorders<sup>19</sup>.

64 While both neuroimaging and genetic studies each have pointed to synaptic alterations in psychiatric  
65 disorders, only a few have specifically tested this hypothesis in an integrated imaging-genetics framework.  
66 A few studies have explored the genetic architecture of functional brain connectivity<sup>20-24</sup>, and studies  
67 assessing polygenic risk scores have indicated links between psychiatric disorders and abnormal brain  
68 connectivity<sup>25,26</sup>. Previous studies also illustrated genetic correlation between various brain imaging  
69 phenotypes and psychiatric disorders that confirm a large degree of shared effect sizes across single  
70 nucleotide polymorphisms (SNPs)<sup>27-29</sup>. However, we still lack a concise map of the overlap in genetic  
71 architecture between psychiatric disorders and the brain functional connectome.

72 Recent evidence from anatomical imaging suggests a distributed nature of genetic effects on the brain,  
73 calling for tools that take a multivariate approach to imaging genetics, beyond univariate genome-wide  
74 association studies of single brain phenotypes<sup>30</sup>. We hypothesized that such distributed nature of genetic  
75 effects is also observable in the genetic architecture of functional imaging given the functional interplay of  
76 brain regions (nodes) in the connectome. A multivariate approach would perform better at capturing these  
77 distributed effects than conventional univariate GWASs<sup>30</sup>. Using data from the UK Biobank, we therefore  
78 deployed such approach to study the genetic architecture of functional brain connectivity – here defined as  
79 the correlation between time series data of large-scale brain network nodes<sup>31,32</sup>. Based on previous  
80 research pointing at dysconnectivity in psychiatric disorders, we expected that there is overlapping genetic

81 architecture between the functional connectome and the disorders that can be captured using our  
82 multivariate approach. We therefore assessed genetic overlap between the connectome and eight major  
83 psychiatric disorders (ADHD, AN, ANX, ASD, BIP, MDD, PTSD and SCZ; Suppl. Table 1).

84

## 85 **Results**

### 86 *Multivariate and univariate genome-wide association studies of the connectome*

87 We performed two multivariate GWAS using the Multivariate Omnibus Statistical Test (MOSTest)<sup>30</sup>,  
88 which exploits the shared signal between related traits to discover genetic variants associated with the  
89 traits in a multivariate fashion. We performed one MOSTest analysis based on connectivity of 210  
90 connections between 21 large-scale brain network nodes derived from an independent component analysis  
91 (ICA), and one based on signal variance across the duration of the functional scan in the respective 21  
92 nodes. The two measures (connectivity and node variance) are mathematically related, yet they reflect  
93 different properties of functional brain connectivity, specifically properties of within large-scale brain  
94 network connectomics (node variance; referred to as node level) and between network connectomics  
95 (connectivity; referred to as edge level). Both measures have previously been found to be altered in  
96 psychiatric disorders<sup>33</sup>. The main analysis included data from 30,701 white British individuals aged 45-82  
97 years (52.8% females) and replication analysis included an independent sample of 8954 individuals (42%  
98 white British) aged 45-83 (52.9% female). The Miami plots in Figure 1A illustrate the multivariate genetic  
99 associations calculated using MOSTest (N=30,701), and for comparison the associations identified using  
100 the traditional min-p approach, which takes the smallest p-value across univariate GWASs.  
101 Supplementary Figure 1 depicts corresponding QQ-Plots. MOSTest identified 15 genetic loci significantly  
102 ( $P < 5e-8$ ) associated with functional brain connectivity (FC) and 5 loci significantly associated with node  
103 variance (Suppl. Table 2), whereas the min-p approach only identified 2 loci for FC and 3 loci for node  
104 variance. Four of the five loci identified for node variance were also present for FC, in line with the  
105 phenotypic relationship between the two. Replication analysis in the independent replication sample  
106 (N=8954) confirmed robustness of the main analysis, with 14 of 15 connectivity loci and all node variance  
107 loci replicating at the targeted multivariate replication rate of  $P < .05$  (Figure 1C). Furthermore, to test  
108 whether the method by which we derived the functional brain measures affected the results, we  
109 supplemented our data-driven ICA approach with a separate region of interest (ROI) based pipeline, where  
110 we defined brain networks using an atlas of brain regions (see *Methods*). Results of these analyses indicate  
111 converging results despite an independent processing pipeline and network definition approach (Suppl.  
112 Fig. 2, Suppl. Table 3).

113 The bottom row in Figure 1A shows individual univariate p-values for the MOSTest-discovered  
114 loci, illustrating that the univariate approach is only good at capturing strong effects (e.g. locus 3 for FC),  
115 yet fails to discover loci with enriched signal across brain phenotypes. This also indicates that signal

## Roelfs et al. | Genetics of the brain functional connectome

116 captured by the min-p approach reflects mostly the effect of individual phenotypes, rather than the  
117 combined signal as captured by MOSTest. Figure 1B further illustrates the distributed nature of effects  
118 across the brain, where a given locus shows differential patterns of regional SNP effects. Finally, genetic  
119 correlation analysis of univariate node variance GWAS (Suppl. Fig. 3) illustrated strong genetic  
120 correlations between different brain network nodes, largely in line with the phenotypic correlations  
121 observed when correlating the fMRI time series, adding further support to a distributed nature of effects in  
122 fMRI-based connectomics.  
123

Roelfs et al. | Genetics of the brain functional connectome

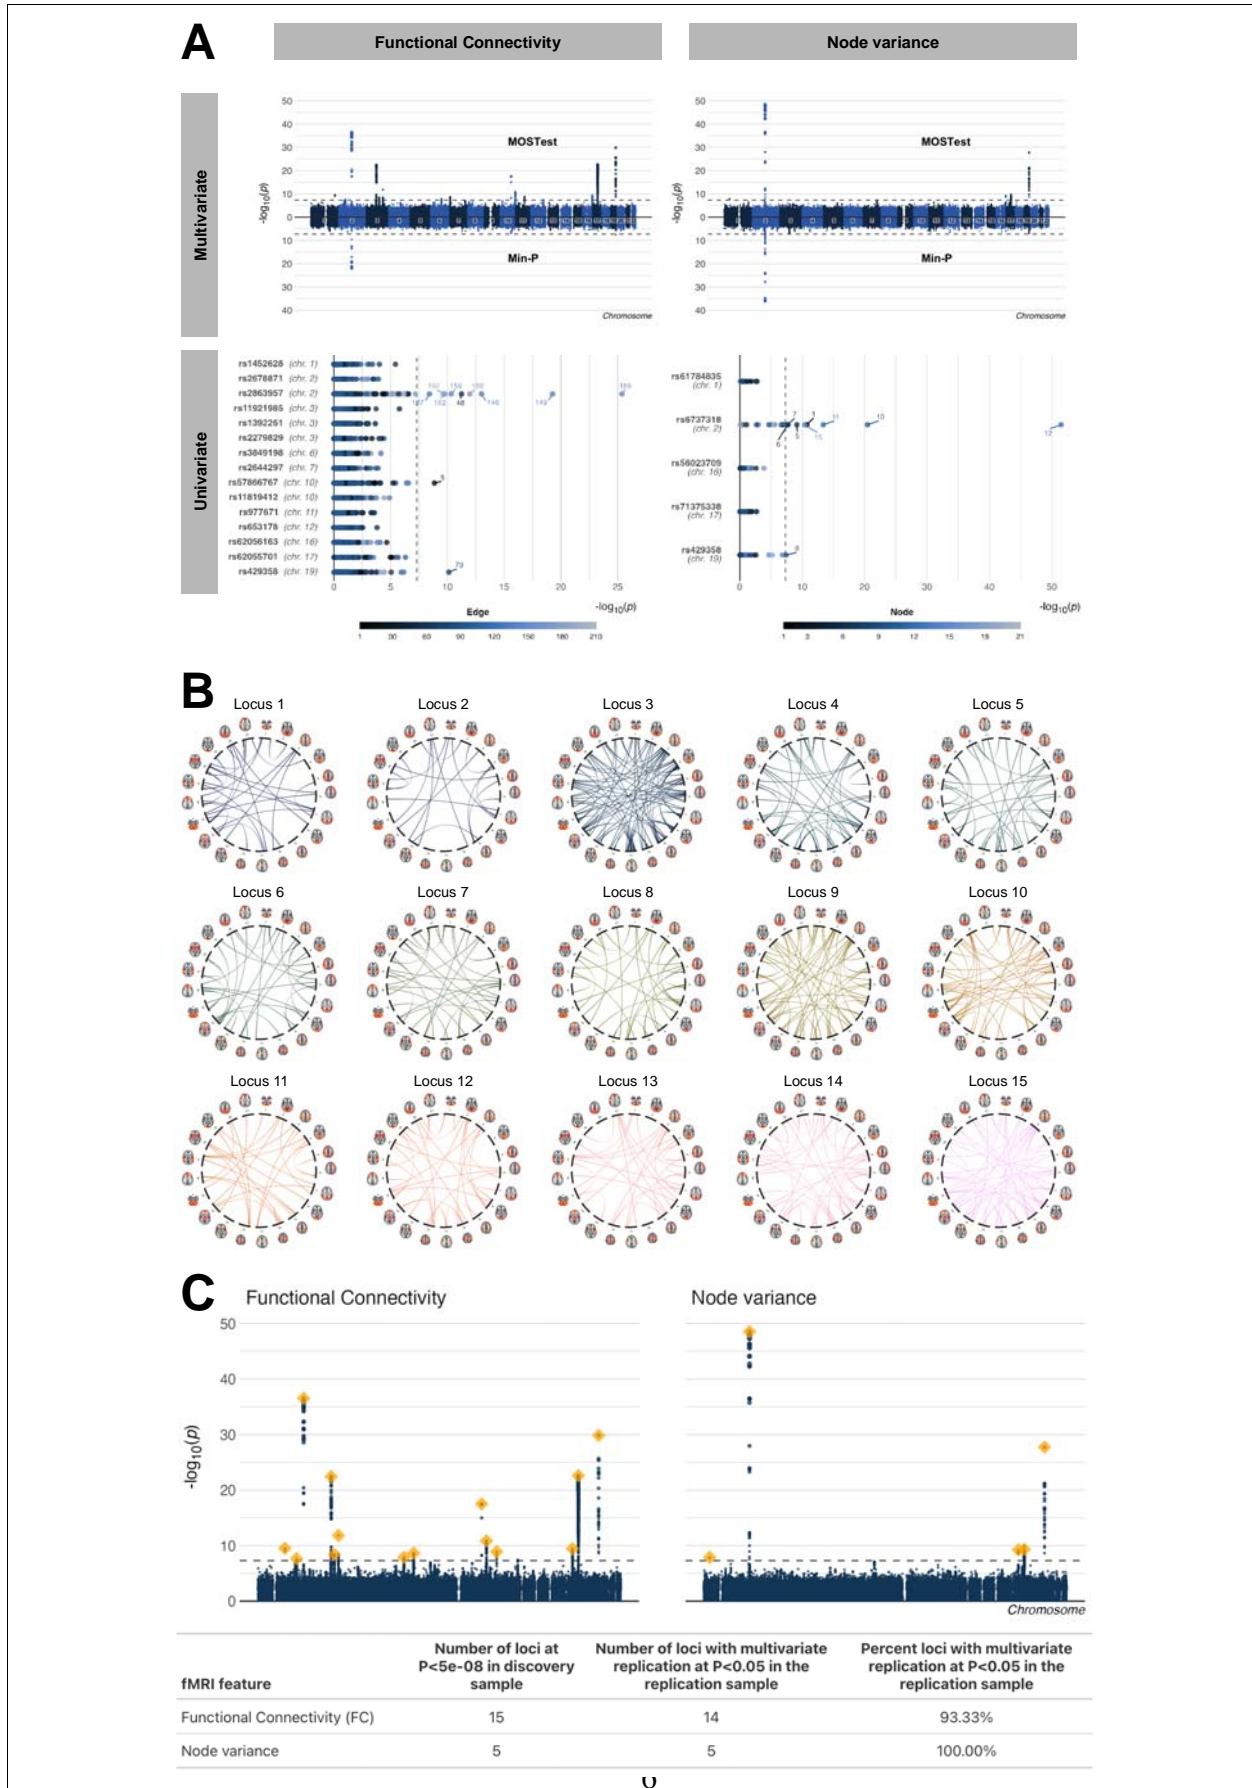

**Figure 1. Multivariate and univariate architecture of the brain functional connectome highlight a distributed nature of effects across the brain.** (A) The left column of the figure illustrates the results for functional brain connectivity, the right column for node variance. The first row shows Miami plots with the multivariate GWAS results from the MOSTest approach in the top, and the results from the traditional min-p approach at the bottom. The second row shows for each locus identified by MOSTest, the univariate p-values of the lead SNP in each locus. A majority of loci identified by the multivariate approach were not detected via the univariate approach. P-values are two-sided. (B) For each of the genome-wide significant loci underlying functional brain connectivity identified using the multivariate MOSTest approach, this panel shows nominally significant ( $P < 0.05$ ) connections from corresponding univariate statistics. These figures show differential patterns of regional SNP effects and highlight the distributed nature of the genetic effects on connectivity. (C) Results from replication analysis. The Manhattan plots depict the MOSTest summary statistics from Panel A and the loci replicated at nominal  $P < .05$  in the independent replication sample are shown in orange. The table specifies corresponding multivariate replication numbers.

124

125

126

127

128

129

130

131

132

133

134

135

136

137

138

139

140

141

To complement the multivariate stream, we further analyzed the univariate GWAS for each connection in the full brain network and for each node variance separately, investigating whether the identified architecture from MOSTest is largely determined by a few network nodes or connections contributing with prominent signal or if it is determined by many nodes or connections, each contributing with subtle signal. Figure 2 depicts the SNP-based heritability for each connection (panel A) and for each node (panel B). SNP-based heritability ranged from 0.14% to 10.58% for brain connectivity (for 7 connections it could not be computed) and 137 out of 210 connections had a heritability above 1.96 times its standard error, indicating genetic signal<sup>34</sup>. The connection with the highest heritability was the connection between nodes reflecting activity in the prefrontal cortex (network 16) and the frontal network (network 14). For node variance, SNP-based heritability ranged from 3.92% to 13.64% with all nodes above 1.96 times their standard error, and highest heritability observed for node 9 (temporo-parietal network). Univariate analysis revealed no significant loci for any of the nodes or edges when controlling for the total number of edges or nodes through Bonferroni correction. The number of significant loci for the multivariate stream compared to the univariate stream adds further support that the genetic signal is distributed across the brain functional connectome, allowing us to capitalize on the shared signal for loci discovery.

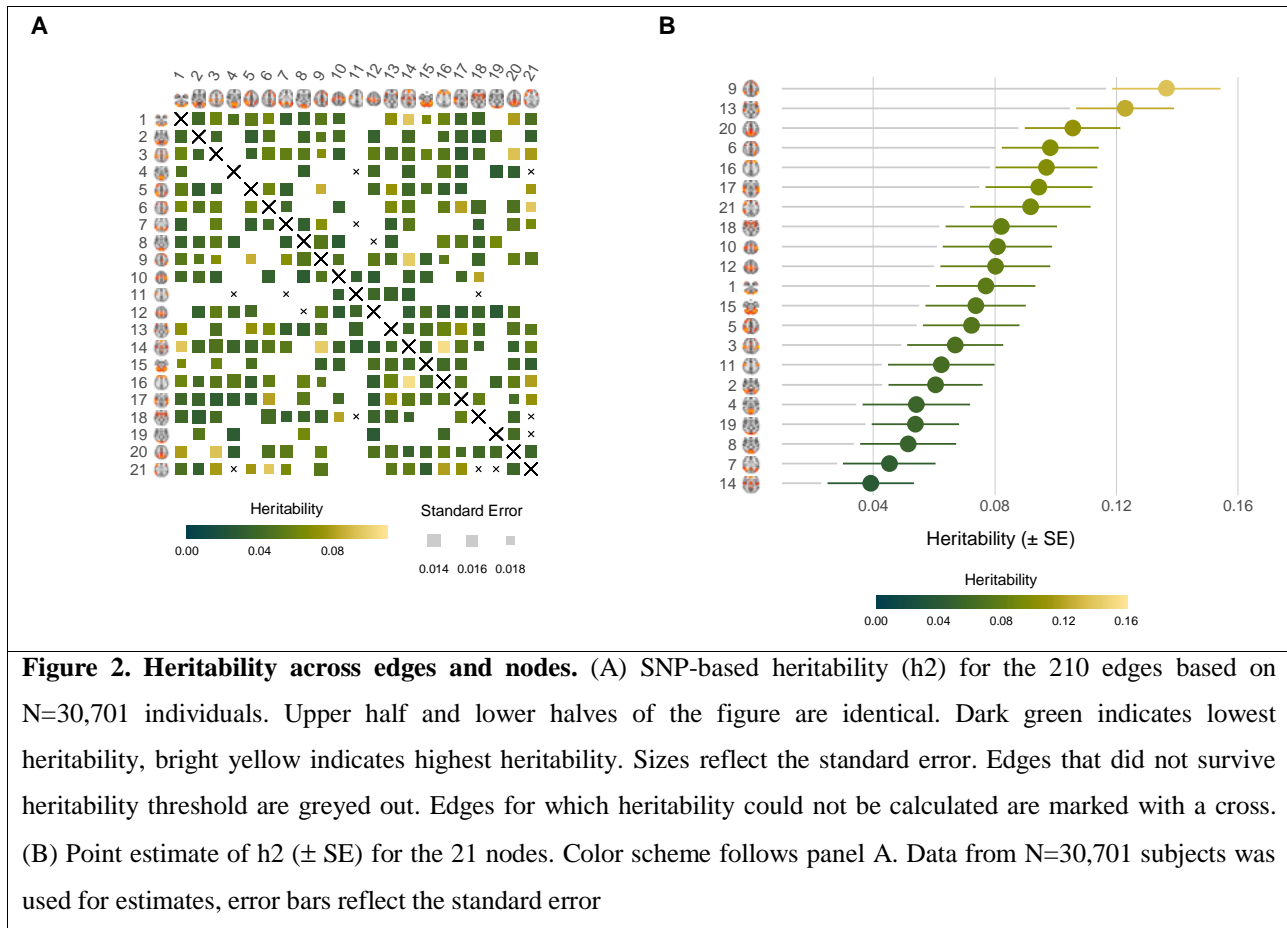

142  
 143 *Genetic overlap between connectome and psychiatric disorders*  
 144 Next, using conjunctural FDR analysis<sup>35</sup>, we tested for overlap between the two MOSTest-derived  
 145 genetic profiles (functional connectivity and node variance) with eight major psychiatric disorders,  
 146 specifically Attention-Deficit Hyperactivity Disorder (ADHD)<sup>36</sup>, anorexia nervosa (AN)<sup>37</sup>, anxiety  
 147 disorder (ANX)<sup>38</sup>, autism spectrum disorder (ASD)<sup>39</sup>, bipolar disorder (BIP)<sup>40</sup>, major depression (MD)<sup>41</sup>,  
 148 Post-Traumatic Stress Disorder (PTSD)<sup>42</sup>, and schizophrenia (SCZ)<sup>43</sup>. Conjunctural FDR leverages  
 149 pleiotropic enrichment (statistical pleiotropy<sup>44</sup>) between two phenotypes to identify genetic loci jointly  
 150 associated with them. As shown in Figure 3, we found shared loci for seven of the eight disorders, namely  
 151 for ADHD, AN, ANX, ASD, MDD, BIP and SCZ. By far the largest number of shared loci was  
 152 implicated for SCZ (43 for FC, 22 for node variance). We found 6 loci for FC and 1 locus for node  
 153 variance in ADHD, 9 loci for FC and 2 loci for node variance in BIP, and 4 loci for FC and 3 loci for node  
 154 variance in ASD. Additionally, we found 1 shared locus between FC and MDD, 1 shared locus between  
 155 FC and AN, and 1 shared locus between node variance and ANX. We did not find any shared loci between  
 156 either FC or node variance and PTSD. Supplementary Figure 4 depicts quantile-quantile plots for all  
 157 genetic overlap analyses. Additional sensitivity analyses using a more stringent FDR threshold confirmed



## Roelfs et al. | Genetics of the brain functional connectome

158 largest overlap for SCZ with FC among the traits (Suppl. Table 4). Analysis with a negative control trait  
159 (vitamin D levels:  $N = 79,366$ )<sup>45</sup> yielded no significant overlap for node variance and two loci for  
160 connectivity (Suppl. Fig. 5). Finally, re-analysis with the ROI-based pipeline confirmed genetic overlap  
161 identified in the ICA-based analysis, again with most loci implicated for SCZ (Suppl. Fig. 6).

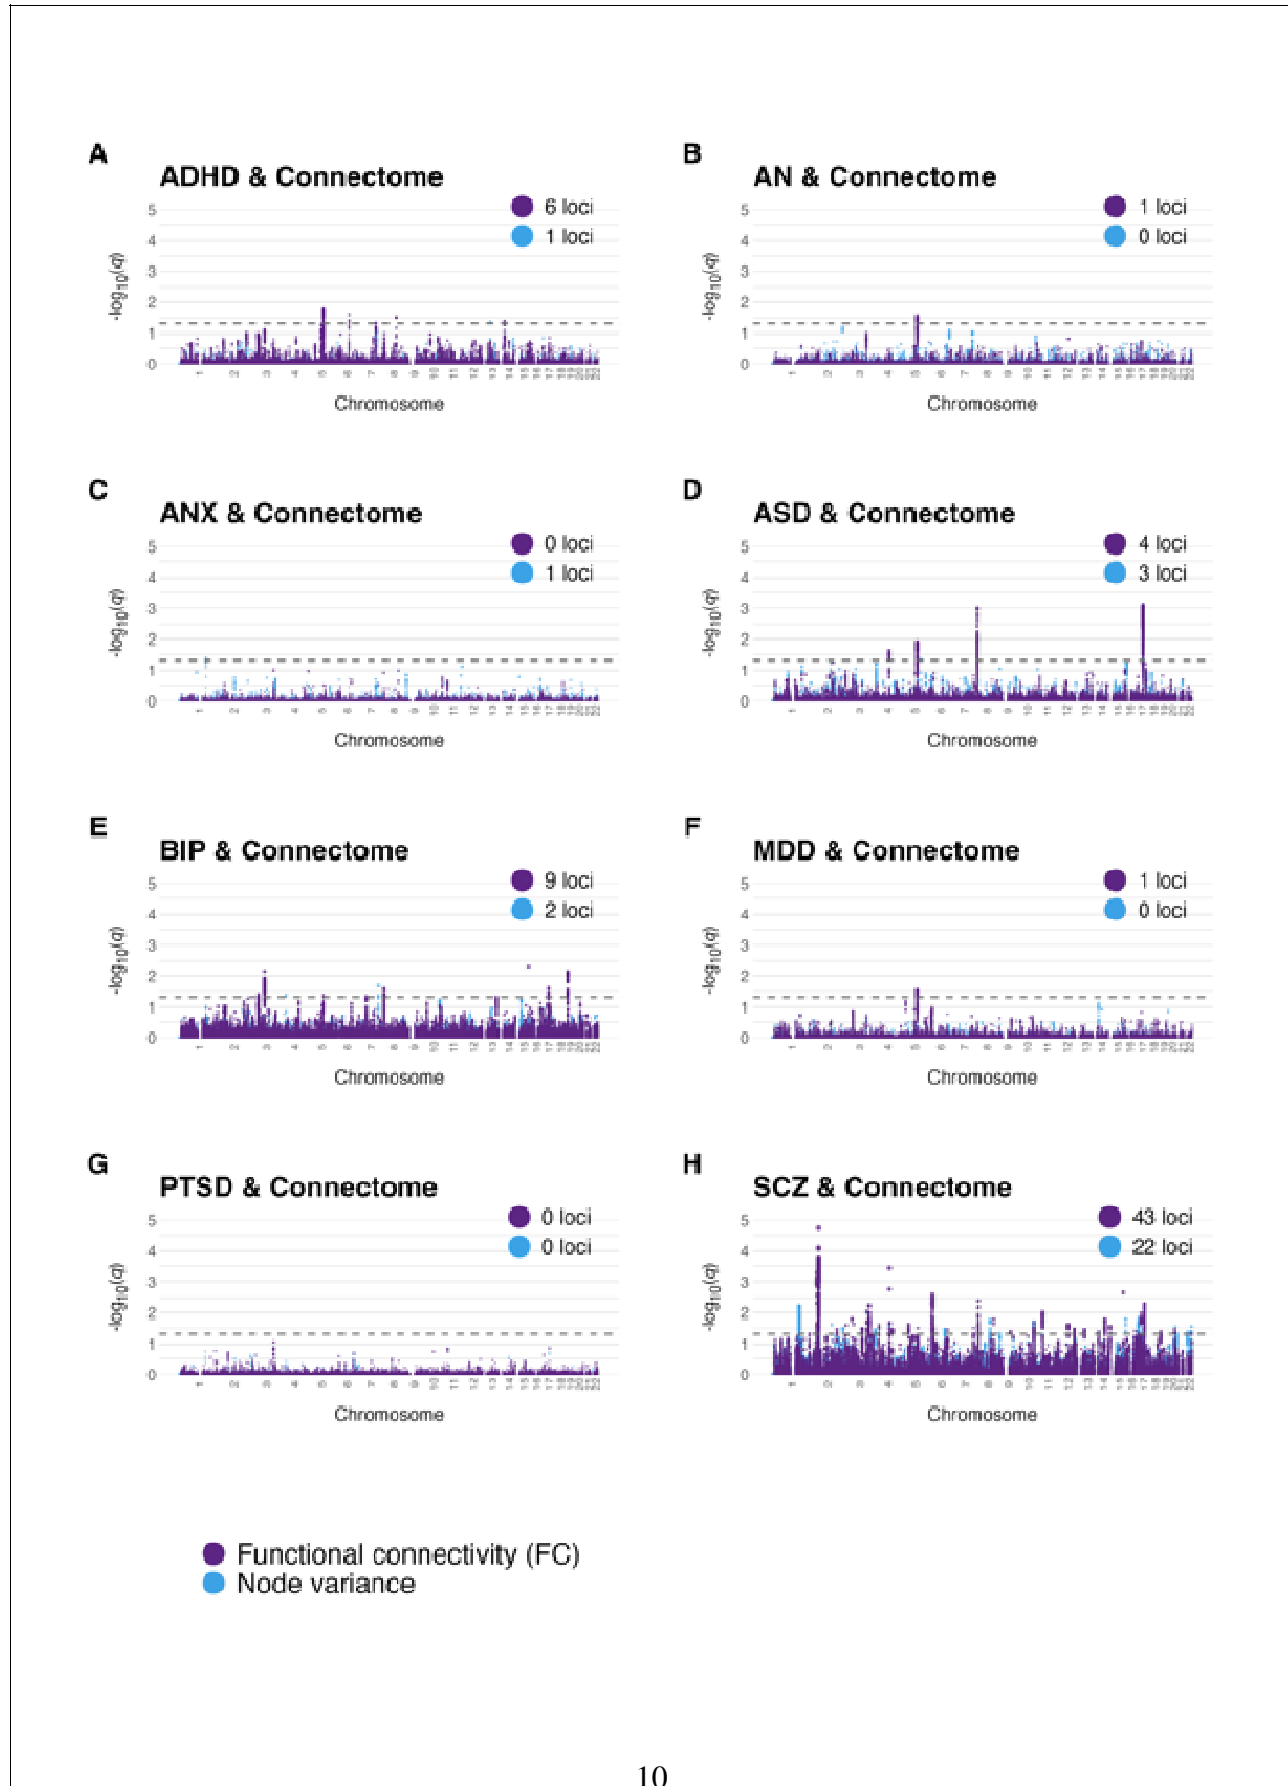

**Figure 3. Manhattan plots illustrating genetic overlap between disorders and the multivariate functional brain phenotypes.** Each panel (A-H) shows the association each psychiatric condition. for Association strength per locus is depicted as q-value from the conjunctional FDR analysis<sup>46</sup>. Values for FC and node variance are shown in the same figure with separate colors.

162  
163 Using Functional Mapping and Annotation of GWAS (FUMA)<sup>47</sup>, we mapped the loci shared  
164 between the connectome and the psychiatric disorders to 180 genes, listed in Suppl. Table 5 (for  
165 comparison to ROI-based analysis, see Suppl. Table 6). We tested for enrichment for biological processes  
166 (GO) and identified 125 significant associations, many of which are relevant to neural system  
167 development and functioning (Suppl. Fig. 7). Using *SynGO*<sup>48</sup>, we linked 23 of the 180 genes to synapse  
168 functioning (Suppl. Table 7). For example, one of the loci shared between SCZ and FC was mapped to  
169 BDNF, which is a major regulator of synaptic transmission and synaptic plasticity<sup>49</sup>. Another example is  
170 NRXN1, found also for SCZ and FC, which is known for its role in the formation of synaptic contacts<sup>50</sup>.  
171 Utilizing the pathway browser on the identified gene sets<sup>51</sup>, we also found that the mapped genes were  
172 involved in cell signaling and signal transduction, more specifically protein-protein interactions at the  
173 synapses, WNT and NTRK signaling, but also a number of other biological processes such as  
174 chromosome maintenance and mitosis (Suppl. Fig. 8 and Suppl. Table 8).

175 In addition to the conjunctional FDR analyses, we also calculated genetic correlation between  
176 each connection or node surviving our pre-defined threshold of 1.96 times its SE and the eight psychiatric  
177 disorders, allowing us to compare the multivariate findings to results from a univariate approach. Figure  
178 4A illustrates that genetic correlation was generally low for the connectome and only one connection  
179 survived after correcting for all eight disorders and all connections, specifically a connection between the  
180 right ventral (network 21) and the prefrontal network (network 16) was significantly associated with BIP  
181 ( $r_g = -0.25$ ,  $p_{\text{BONF}} = 0.0006$ ). When only correcting for the number of connections but not for the number  
182 of disorders, we found an additional significant association, which was the link between the auditory  
183 (network 17) and the subcortical (network 18) node which correlated with SCZ ( $r_g = 0.25$ ,  $p_{\text{BONF}} =$   
184  $0.0137$ ). For node variance, we found two significant associations when correcting for all disorders and  
185 nodes. Specifically, variance in the temporo-parietal network (network 9) was significantly correlated with  
186 both, SCZ ( $r_g = 0.22$ ,  $p_{\text{BONF}} = 3.9\text{e-}6$ ) and BIP ( $r_g = 0.17$ ,  $p_{\text{BONF}} = 0.03$ ).

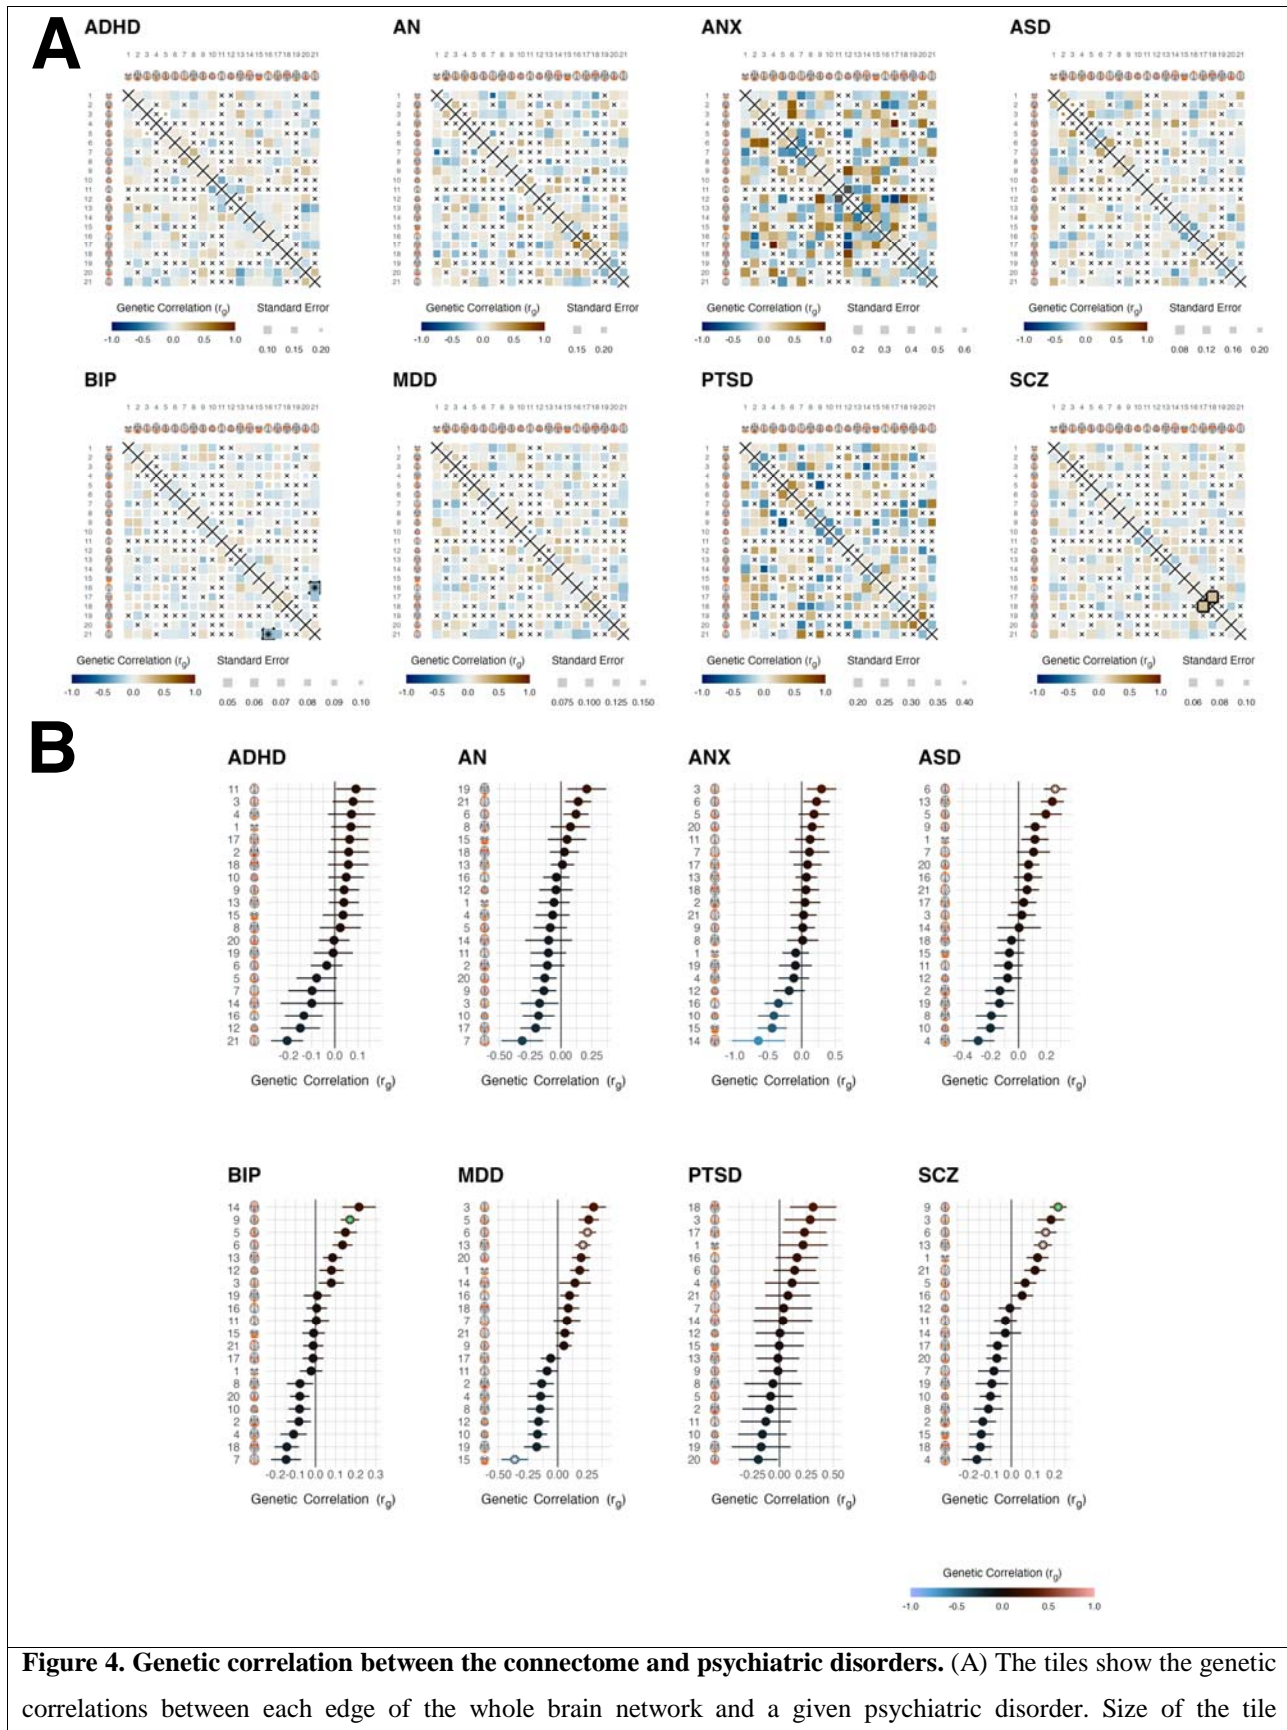

represents the standard error. Edges with a heritability below 1.96 its standard error were not considered in the analysis and marked with a black cross. Among all disorders, only one edge marked with a black border was significant for SCZ after correcting for the number of edges (210), whereas none was significant when correcting for the number of edges and the number of disorders. Upper and lower half of each matrix are identical. Sample sizes underlying the summary statistics used for genetic correlation analysis are provided in Supplementary Table 1. (B) Genetic correlation ( $\pm$  SE) analysis at the node level. Significant genetic correlations within a psychiatric disorder are indicated with a white asterisk when correcting for the number of nodes, whereas a green asterisk indicates significance when correcting for both, the number of nodes and the number of disorders. The error bars reflect the standard error. The latter stringent correction was surpassed for variance of the temporo-parietal node and SCZ.

187  
188 **Discussion**  
189 Taken together, our study provided insight into the shared genetic architecture between measures of the  
190 brain functional connectome and common psychiatric disorders. Deploying multivariate genetic analyses  
191 of fMRI data from more than 30,000 individuals allowed us to capitalize on the distributed nature of  
192 genetic variation across the interconnected whole brain network to discover novel connectome-associated  
193 variants beyond what can be discovered using standard univariate approaches. Our analyses pinpointed a  
194 number of gene variants overlapping between the connectome and psychiatric disorders, where several of  
195 the corresponding mapped genes are known for their involvement with synapse formation and  
196 functioning.

197 We used two measures of the brain functional connectome – the 210 correlations of brain signal from  
198 21 nodes as measures of functional brain connectivity as well as signal variation across time of these 21  
199 network nodes. Given the interconnectedness of the connectome, we hypothesized that many connections  
200 or nodes would have overlapping genetic signatures. Indeed, our results illustrate that the genetic  
201 architecture of brain function is distributed across the brain. Our deployed multivariate approach  
202 successfully leveraged this pleiotropy for discovery, revealing a variety of genetic effects that would not  
203 have been discovered with the standard univariate GWAS approach, including the commonly used min-p  
204 approach, which identifies the minimum p-value across univariate GWASs. We observed that the  
205 significant lead SNPs from MOSTest were often not significantly associated with the univariate measure.  
206 This demonstrates that using multivariate genetic analysis can be valuable to complement the univariate  
207 approach in settings like brain imaging where the signal is largely distributed.

208 From our multivariate signatures of the connectome, we were able to identify a number of shared loci  
209 with psychiatric disorders through conjunctive FDR analysis. The strongest overlap was implied for  
210 schizophrenia yet all other psychiatric disorders apart from PTSD showed some degree of overlap as well,  
211 in particular with connectivity. Identification of overlap to some degree depends on statistical power  
212 (overall heritability, sample size, quality of phenotyping, heterogeneity across contributing cohorts, among

213 others), which may for example explain the lack of findings for PTSD. It is important to note that sample  
214 size alone cannot explain the observed differences in overlapping loci. The bipolar disorder and  
215 schizophrenia GWASs have similar sample sizes yet we discovered many more loci for the latter.  
216 Likewise, our negative control analysis of a well powered trait yielded only two overlapping loci for  
217 connectivity and no significant locus for node variance. How the comparison between all disorders will  
218 look at similar sample size remains to be investigated.

219 Several synapse-related genes were among the overlapping genes, including some involved in the  
220 neurodevelopmental formation of synapses. This is particularly intriguing given that many psychiatric  
221 disorders are conceptualized as neurodevelopmental disorders even if they are typically diagnosed in  
222 adulthood. Further, many disorders are conceptualized as disorders of brain dysconnectivity, as initially  
223 proposed for schizophrenia<sup>52</sup>. This is now established across various disorders<sup>53</sup> and our results provide  
224 further evidence from the genetics end.

225 While multivariate analysis enabled us to boost discovery across the imaging phenotypes, its  
226 multivariate nature limits interpretation of single features, such as for example biological interpretation of  
227 specific brain networks. We thus complemented our multivariate analyses with univariate analyses and  
228 showed a map of genetic correlations between connectivity, node variance and psychiatric disorders.  
229 Univariate correlations were overall weak and only a few edges or nodes were significant after correcting  
230 for multiple testing. A particular pronounced univariate association was found for the temporo-parietal  
231 network, which was genetically correlated with schizophrenia ( $p_{\text{BONF}} = 3.9\text{e-}6$ ) and bipolar disorder ( $p_{\text{BONF}} = 0.03$ ). Strikingly, in a previous fMRI study this temporo-parietal network was found to be consistently  
233 altered in schizophrenia across five different fMRI tasks, with bipolar disorder clustering between  
234 schizophrenia and healthy controls in three out of five tasks<sup>54</sup>. Nonetheless, given the overall weak  
235 univariate associations and the large amount of univariate analyses performed, caution is warranted when  
236 interpreting potential disorder-specific patterns. Lack of genetic correlating does not necessarily indicate  
237 lack of polygenic overlap, as shown previously by multiple methods, including cross-trait MiXeR  
238 analysis<sup>55</sup> and LAVA<sup>56</sup>. It is well possible that a variety of SNPs with opposing effect directions cancel  
239 each other out, which would result in low genetic correlation despite genetic overlap. The finding that  
240 genetic correlations from univariate analyses are relatively weak despite significant genetic overlap  
241 between our multivariate GWAS and several psychiatric disorders provides further evidence that  
242 multivariate analysis is an important method to dissect complex interactions in psychiatric genetics.

243 We here provided results from analyses at the edge level (functional connectivity) and node level  
244 (node variance). The latter showed larger heritability and larger effect sizes than functional connectivity.  
245 This may be partly explained by the granularity of the connectivity measure, or a better representation of  
246 the nodes across individuals compared to the potentially highly individualized network configurations<sup>57,58</sup>.  
247 At the phenotypic level, node variance has been associated with psychiatric disorders, with effect sizes

248 comparable to connectivity<sup>33,59,60</sup>. Given that our genetic analyses often imply similar genes for node-level  
249 and connectivity-level, the underlying sources may align despite differences in current association effect  
250 sizes.

251 Some aspects are relevant for interpreting the current findings. First, MOSTest is to some degree  
252 dependent on granularity as also previously shown<sup>61</sup> which may explain why MOSTest identified more  
253 loci for functional connectivity than for node variance. More research using different approaches to  
254 network definition may yield further discoveries, however, our comparison of the genetic architecture of  
255 ICA-based and ROI-based networks also indicated large overlap, supporting robustness of the current  
256 findings. While the granularity of the ICA-based and ROI-based networks were kept similar in this  
257 analysis, there is still substantial difference in their derivation, and thus it is remarkable that we reproduce  
258 our ICA-based genetic findings with the ROI-based approach. Specifically, the spatial pattern of ICA-  
259 based networks are data-driven, and connectivity is determined by means of regularized partial  
260 correlations. In contrast, ROI-based networks are spatially defined with an atlas and connectivity is  
261 estimated via full correlations. We here analysed large-scale brain networks. Technically, MOSTest is  
262 capable to scale to much large numbers of input features<sup>62</sup> and thus analyses with more fine-grained  
263 parcellations or even at the vertex or voxel level might be possible. Such scaling would need to be  
264 performed under careful observation of noise structures in the functional imaging data to ensure that the  
265 potential benefit of more features is not diminished by added noise. Second, lack of effect directionality is  
266 a limitation of the multivariate analysis, which is why we provided univariate analyses alongside.  
267 Furthermore, several post-GWAS analyses such as for example the conjunctive FDR framework do not  
268 require effect direction and can thus be performed with the resulting multivariate statistics. We believe the  
269 strengths of the multivariate approach outweigh the limitations, and a tandem approach with both  
270 multivariate and univariate methods optimizes utility of this method. Finally, with conjunctive FDR  
271 analysis it can happen that some discoveries are novel, meaning they are missed by standard GWAS due  
272 to lack of power or excessive burden of multiple testing. However, it is expected that conjunctive FDR  
273 loci will be discovered by these standard GWAS methodology once sample sizes increase further. For  
274 example, two loci recently discovered in a GWAS on ADHD<sup>36</sup> where already discovered earlier using a  
275 conjunctive FDR analysis with educational attainment<sup>63</sup>.

276 In conclusion, we here revealed a distributed nature of genetic effects on brain function and  
277 integration, and identified a number of genetic loci associated with key properties of the brain functional  
278 connectome. Further, we revealed a large degree of genetic overlap between multivariate measures of the  
279 brain functional connectome and a number of psychiatric disorders with genes pointing at synaptic  
280 plasticity. This may help further disentangle the complex biological underpinnings of psychiatric disorders  
281 and provide a bridge between functional connectivity alterations and genetic variations in patients. There

282 is a need for follow-up experimental studies building on the discovered loci to disentangle the biological  
283 mechanisms.

284

## 285 **Methods**

### 286 *Sample and Exclusion Criteria*

287 We accessed resting state fMRI data from the UK Biobank<sup>64</sup>, a large-scale resource of imaging, genetics,  
288 and other biological and psychological data (access with permission no. 27412). All participants provided  
289 signed informed consent before inclusion in the study. The UK Biobank was approved by the National  
290 Health Service National Research Ethics Service (ref. 11/NW/0382). We selected data from individuals  
291 with White British ancestry, identified based on the genetic clustering performed by the UK Biobank  
292 team<sup>65</sup>. Data of all eligible participants were included for the main analysis in November 2020 and we did  
293 not exclude individuals based on a diagnosis. The resulting sample comprised data of 30,701 individuals  
294 with a mean age of 64.24 years (SD: 7.50, range: 45-82; 52.8% females). In total 2654 individuals  
295 (8.62%) had a neurological or psychiatric diagnosis (excluding encephalitis). Additional data became  
296 available afterwards and was partly used for replication (see Replication section).

297

### 298 *Image Acquisition and Preprocessing*

299 Data had been acquired by the UK Biobank study team<sup>64</sup>. The fMRI images were collected on four  
300 identical 3T Siemens Magnetom Skyra scanners in the UK with a 32 channel head coil (Siemens  
301 Healthcare GmbH, Erlangen, Germany). Data was recorded using a gradient-echo echo planar imaging  
302 sequence with x8 multislice acceleration (TR: 0.735s, TE: 39ms, FOV: 88x88x64 matrix, FA: 52°) with a  
303 voxel size of 2.4x2.4x2.4mm. One fMRI sequence took approximately 6 minutes. The protocol further  
304 included T1 imaging, acquired using a MPRAGE sequence with in-plane acceleration (iPAT) of 2  
305 (resolution: 1mm<sup>3</sup>, FOV: 208x256x256 matrix).

306 Data had been preprocessed by the UK Biobank study team as described in Alfaro-Almagro *et al.*<sup>66</sup>.  
307 Briefly, their preprocessing used the FSL pipeline<sup>67,68</sup>, which included motion correction using MC-  
308 FLIRT (Jenkinson, Bannister, Brady, & Smith, 2002), grand-mean intensity normalization, high-pass  
309 filtering through Gaussian-weighted least-squares straight line fitting, EPI unwarping and GDC  
310 unwarping. Structured artifacts were removed using ICA and FIX<sup>69,70</sup>, where the FIX classifier was hand-  
311 trained on 40 UK Biobank datasets. According to Alfaro-Almagro *et al.* only 1% of variance in a scan is  
312 due to head motion following motion correction and FIX<sup>66</sup>. The final step was a group ICA using  
313 MELODIC<sup>71</sup> which decomposed the data using independent component analysis into 25 components. The  
314 spatial profiles of the components can be reviewed in a navigable visualization tool available at  
315 [https://www.fmrib.ox.ac.uk/ukbiobank/group\\_means/rfMRI\\_ICA\\_d25.html](https://www.fmrib.ox.ac.uk/ukbiobank/group_means/rfMRI_ICA_d25.html).



316 We retrieved individual level time series data for each subject and component (output from dual  
317 regression at model order 25). We computed functional brain networks using the FSLNets toolbox<sup>72</sup>. First,  
318 we regressed the time series of four noise components from the time series of the remaining 21  
319 components and subsequently removed those four components. Suppl. Fig. 9 depicts maps for each of the  
320 21 components. We estimated functional connectivity (FC) as the regularized partial correlations of the  
321 component time series, implementing an approach developed by Ledoit & Wolf (2012) which performs an  
322 automated adjustment of the shrinkage parameter lambda, as implemented in our earlier work<sup>54</sup>. As the  
323 last step, we regressed age, age<sup>2</sup>, sex, scanner, motion, signal-to-noise ratio (SNR), and the first 20 genetic  
324 principal components from the individual connection strengths, residualizing each edge (210 in total) of  
325 the partial correlation matrix. In addition to functional brain connectivity, we also performed an analysis  
326 of the variance in signal amplitude of the 21 components<sup>67</sup>, and performed the same residualisation in this  
327 node-level analysis as described above for the edge level.

328 To test if our results were largely dependent on the pipelines used to define brain networks, we  
329 complemented our main data-driven ICA approach with a region-of-interest (ROI) approach using the  
330 Schaefer parcellation with 1000 parcels. For this pipeline we accessed FEAT<sup>73</sup> processed folders from the  
331 UK Biobank and registered all images to standard MNI space. For each Schaefer-defined ROI there exists  
332 a mapping to the 17 large-scale brain networks defined by Yeo et al (2011). To achieve comparability to  
333 our main ICA-based analysis which comprises 21 network nodes, we averaged the time series of all  
334 Schaefer-defined ROIs corresponding to each Yeo-defined network, yielding ROI-based networks with 17  
335 nodes. Following the standard procedure for ROI-based brain networks, we defined these as the Pearson  
336 correlation of the 17 nodal time series. Furthermore, we derived node variance of these 17 nodes. The  
337 resulting functional brain connectivity as well as node variances went into the same genetic analyses as  
338 performed in the main ICA-based analysis workflow.

339  
340 *Genetic data and QC*  
341 We accessed UKB v3 imputed data<sup>64</sup>. The data acquisition and preprocessing pipeline is described in  
342 Bycroft *et al.*<sup>64</sup>. We applied standard quality control procedures to this data and removed SNPs with a  
343 minor allele frequency below 0.001, SNPs missing in more than 5% of individuals, SNPs with an  
344 imputation quality below 0.5, and SNPs failing the Hardy-Weinberg equilibrium test at  $P < 1e-9$ .

345  
346 *Univariate and Multivariate Genome-Wide Analysis*  
347 We performed multivariate and univariate GWAS using the Multivariate Omnibus Statistical Test  
348 (MOSTest)<sup>30</sup>. MOSTest takes as input all univariate test statistics ( $z$ -scores) for each SNP, as obtained  
349 through standard association testing with each pre-residualized phenotype, and compares this to test  
350 statistics obtained following a single random permutation of the genotype vector. A multivariate test

## Roelfs et al. | Genetics of the brain functional connectome

351 statistic is then calculated from this comparison as the Mahalanobis norm, with the probability of the  
352 observed test-statistic being derived from a Chi-square distribution. Further details of the method are  
353 described in Van der Meer *et al.*<sup>30</sup>. MOSTest returns a multivariate test statistic, where in contrast to  
354 classical univariate GWAS that link a given SNP with a single phenotype, for each SNP the multivariate  
355 association across all included phenotypes is provided. This allowed us to retrieve one multivariate  
356 summary statistic for functional brain connectivity (edge level), and one for node variance (node level). In  
357 addition, we retrieved classical univariate summary statistics for follow-up analyses.

358

### 359 *Summary Statistics for Psychiatric Disorders*

360 We accessed publicly available summary statistics for Attention-Deficit Hyperactivity Disorder  
361 (ADHD)<sup>36</sup>, anorexia nervosa (AN)<sup>37</sup>, anxiety disorder (ANX)<sup>38</sup>, autism spectrum disorder (ASD)<sup>39</sup>, bipolar  
362 disorder (BIP)<sup>40</sup>, major depression (MD)<sup>41</sup>, Post-Traumatic Stress Disorder (PTSD)<sup>42</sup>, and schizophrenia  
363 (SCZ)<sup>43</sup>. For details, see Suppl. Table 1. We used vitamin D<sup>45</sup> as a negative control phenotype because it is  
364 well powered (N = 79,366), has heritability comparable to psychiatric disorders ( $h_{2,twin} \sim 0.6$ ) and is not  
365 genetically correlated with the included psychiatric disorders (all  $P > .05$ ). We performed a GWAS using  
366 plink 2.0<sup>74</sup> on 79,366 participants in the UK Biobank not included in the main analysis.

367

### 368 *Pleiotropy-Informed Conjunctive False Discovery Rate*

369 Due to the complex and polygenic architecture of our brain phenotypes, we utilized pleiotropy-informed  
370 conjunctive false discovery rate as implemented in the pleioFDR toolbox<sup>46</sup>. The conjunctive FDR  
371 analysis identifies shared genomic loci between two traits regardless of effect directionality and effect  
372 size, making it ideally suited to compare a multivariate summary statistic from MOSTest (here: FC and  
373 variance) against the summary statistics of a given disorder (here: SCZ, BD, MDD, ASD, ADHD, ANX,  
374 PTSD, AN).

375

### 376 *Linkage Disequilibrium Score Regression*

377 For the univariate summary statistics, we estimated partitioned heritability<sup>75</sup> and genetic correlation with  
378 LD-score regression using the LDSC tool<sup>76</sup>. We also estimated genetic correlation between each edge and  
379 variance across time in each node with the eight psychiatric disorders using cross-trait LDSC<sup>76-78</sup>. Of note,  
380 genetic correlations require effect directions and are thus not applicable to the multivariate summary  
381 statistics derived from MOSTest. We therefore used genetic correlations in connection with univariate  
382 statistics as a complement to the multivariate pipeline.

383

### 384 *Gene Mapping and Annotation*

## Roelfs et al. | Genetics of the brain functional connectome

385 We used the Functional Mapping and Annotation (FUMA version v1.3.6a) tool to map loci derived  
386 through conjunctive FDR analyses to genes and tested for significant enrichment of biological  
387 processes<sup>47</sup>. We then fed the genes identified through FUMA into the *SynGO* (v1.1) toolbox to map  
388 synaptic genes<sup>48</sup>, and the *reactome* (v78) toolbox to map the genes to a range of biological processes<sup>51</sup>.

389  
390 *Statistics and Reproducibility*

391 No statistical test was used to predetermine sample size. To validate the discovered loci of the functional  
392 brain measures, we performed a replication analysis of our two main MOSTest analyses on a dataset  
393 containing all subjects with available data (including those with non-White British ancestry) as well as a  
394 new batch of data (including White British) that arrived after we performed the main analyses. This  
395 resulted in a dataset containing 8954 individuals (mean age: 65.20 years, SD: 8.25, range: 45-83; 53.0%  
396 females). Of these, 5155 individuals were of non-White British ancestry and 3799 individuals were of  
397 White British ancestry. The replication sample included 1024 individuals (11.4%) with a diagnosed  
398 neurological or psychiatric diagnosis (excluding encephalitis). We processed this dataset in the same way  
399 as the data from the discovery sample. Multivariate discoveries require a special replication procedure to  
400 ensure that a locus in question is not only showing an association in an independent sample, but also that  
401 the multivariate pattern of that association is consistent between the discovery and the replication samples.  
402 Such procedure has been established in Loughnan et al.<sup>79</sup> For a given SNP in the discovery set, the  
403 procedure provides a composite score (one value for each individual in the validation set) obtained as a  
404 weighted sum of individuals' phenotypes, with weights derived from mass-univariate z-statistics from the  
405 discovery set. If a SNP association represents a real signal in the discovery set, we expect its composite  
406 score to be associated with the genotype in the replication sample at a nominal one-sided  $P < 0.05$ , and to  
407 have a consistent effect direction. Mathematical formulation of the approach is provided in Loughnan et  
408 al.<sup>79</sup>

409  
410 *Inclusion & Ethics*

411 The samples used in this study comprised samples of varying ethnic backgrounds. While the main  
412 analyses unfortunately still incorporate only individuals with a White British ancestry, we used a more  
413 diverse sample to validate our in the replication analyses, to provide insights to make them relevant for  
414 application beyond this well-studied group of White British individuals. Given the limited availability of  
415 data from non-White individuals, the current work cannot rule out ethnicity biases, and replication in  
416 larger and more diverse samples is needed to further assess replication.

417  
418 *Data Availability*

## Roelfs et al. | Genetics of the brain functional connectome

419 Data used in this study are part of the publicly available UK Biobank initiative  
420 (<https://www.ukbiobank.ac.uk/>). Summary statistics for the disorders are publicly available through their  
421 respective consortia (Suppl. Table 1). The summary statistics for the multivariate analyses will be shared  
422 on GitHub (<https://www.github.com/norment/open-science>) upon acceptance.

423  
424 *Code Availability*  
425 Code will be made publicly available via GitHub (<https://www.github.com/norment/open-science>) upon  
426 acceptance of the manuscript.

427  
428 *Acknowledgements*  
429 The authors were funded by the Research Council of Norway (#276082 LifespanHealth, #323961  
430 BRAINGAP, #223273 NORMENT, #283798 ERA-NET Neuron SYNSCHIZ, #249795, #298646,  
431 #300767), the South-East Norway Regional Health Authority (2019101, 2019107, and 2020086), and the  
432 European Research Council under the European Union's Horizon2020 Research and Innovation program  
433 (ERC Starting Grant #802998), as well as the Horizon2020 Research and Innovation Action Grant  
434 CoMorMent (#847776). This research has been conducted using the UK Biobank Resource (access code  
435 27412, <https://www.ukbiobank.ac.uk/>). This work was performed on the TSD (Tjenester for Sensitive  
436 Data) facilities, owned by the University of Oslo, operated and developed by the TSD service group at the  
437 University of Oslo, IT-Department (USIT). Computations were also performed on resources provided by  
438 UNINETT Sigma2 - the National Infrastructure for High Performance Computing and Data Storage in  
439 Norway.

440  
441 *Author Contributions*  
442 D.R. and T.K. conceived the study; D.R. analyzed the data with contributions from T.K.; All authors  
443 contributed with conceptual input on methods and/or interpretation of results; D.R. and T.K. wrote the  
444 first draft of the paper and all authors contributed to the final manuscript.

445  
446 *Competing Interests*  
447 D.R., D.vd.M., D.A., O.F., A.A.S., R.L., C.C.F., L.T.W. and T.K. declare no conflicts of interest. O.A.A.  
448 is a consultant to HealthLytx and received speakers honorarium from Lundbeck. A.M.D. is a Founder of  
449 and holds equity in CorTechs Labs, Inc, and serves on its Scientific Advisory Board. The terms of this  
450 arrangement have been reviewed and approved by UCSD in accordance with its conflict of interest  
451 policies.

452

453 **References**

- 454
- 455 1. Anttila, V. *et al.* Analysis of shared heritability in common disorders of the brain. *Science*  
456 **360**, eaap8757 (2018).
  - 457 2. Fullerton, J. M. & Nurnberger, J. I. Polygenic risk scores in psychiatry: Will they be useful  
458 for clinicians? *F1000Research* **8**, (2019).
  - 459 3. Smoller, J. W. *et al.* Psychiatric genetics and the structure of psychopathology. *Mol.*  
460 *Psychiatry* **24**, 409–420 (2019).
  - 461 4. Sullivan, P. F. & Geschwind, D. H. Defining the Genetic, Genomic, Cellular, and Diagnostic  
462 Architectures of Psychiatric Disorders. *Cell* **177**, 162–183 (2019).
  - 463 5. Vos, T. *et al.* Global burden of 369 diseases and injuries in 204 countries and territories,  
464 1990–2019: a systematic analysis for the Global Burden of Disease Study 2019. *The Lancet*  
465 **396**, 1204–1222 (2020).
  - 466 6. Paulus, M. P. & Thompson, W. K. The Challenges and Opportunities of Small Effects: The  
467 New Normal in Academic Psychiatry. *JAMA Psychiatry* **76**, 353–354 (2019).
  - 468 7. Pettersson-Yeo, W., Allen, P., Benetti, S., McGuire, P. & Mechelli, A. Dysconnectivity in  
469 schizophrenia: where are we now? *Neurosci. Biobehav. Rev.* **35**, 1110–1124 (2011).
  - 470 8. Syan, S. K. *et al.* Resting-state functional connectivity in individuals with bipolar disorder  
471 during clinical remission: a systematic review. *J. Psychiatry Neurosci. JPN* **43**, 298–316  
472 (2018).
  - 473 9. Hong, S.-J. *et al.* Atypical functional connectome hierarchy in autism. *Nat. Commun.* **10**,  
474 1022 (2019).

- 475 10. Gao, Y. *et al.* Impairments of large-scale functional networks in attention-  
476 deficit/hyperactivity disorder: a meta-analysis of resting-state functional connectivity.  
477 *Psychol. Med.* **49**, 2475–2485 (2019).
- 478 11. Brakowski, J. *et al.* Resting state brain network function in major depression - Depression  
479 symptomatology, antidepressant treatment effects, future research. *J. Psychiatr. Res.* **92**, 147–  
480 159 (2017).
- 481 12. Akiki, T. J., Averill, C. L. & Abdallah, C. G. A Network-Based Neurobiological Model of  
482 PTSD: Evidence From Structural and Functional Neuroimaging Studies. *Curr. Psychiatry*  
483 *Rep.* **19**, 81 (2017).
- 484 13. Xu, J. *et al.* Anxious brain networks: A coordinate-based activation likelihood estimation  
485 meta-analysis of resting-state functional connectivity studies in anxiety. *Neurosci. Biobehav.*  
486 *Rev.* **96**, 21–30 (2019).
- 487 14. Fuglset, T. S., Landrø, N. I., Reas, D. L. & Rø, Ø. Functional brain alterations in anorexia  
488 nervosa: a scoping review. *J. Eat. Disord.* **4**, 32 (2016).
- 489 15. Wen, Z. *et al.* Synaptic dysregulation in a human iPS cell model of mental disorders. *Nature*  
490 **515**, 414–418 (2014).
- 491 16. Devor, A. *et al.* Genetic evidence for role of integration of fast and slow neurotransmission in  
492 schizophrenia. *Mol. Psychiatry* **22**, 792–801 (2017).
- 493 17. Howard, D. M. *et al.* Genome-wide association study of depression phenotypes in UK  
494 Biobank identifies variants in excitatory synaptic pathways. *Nat. Commun.* **9**, 1470 (2018).
- 495 18. Ripke, S., Walters, J. T. & O’Donovan, M. C. Mapping genomic loci prioritises genes and  
496 implicates synaptic biology in schizophrenia. *medRxiv* 2020.09.12.20192922 (2020)  
497 doi:10.1101/2020.09.12.20192922.

- 498 19. Lopez de Lara, C. *et al.* Implication of synapse-related genes in bipolar disorder by linkage  
499 and gene expression analyses. *Int. J. Neuropsychopharmacol.* **13**, 1397–1410 (2010).
- 500 20. Aurina Arnatkeviciute, Ben Fulcher, Mark Bellgrove, & Alex Fornito. Where the Genome  
501 Meets the Connectome: Understanding How Genes Shape Human Brain Connectivity.  
502 *PsyArXiv* (2021) doi:<https://doi.org/10.31234/osf.io/hqgz7>.
- 503 21. Barabási, D. L. & Barabási, A.-L. A Genetic Model of the Connectome. *Neuron* **105**, 435-  
504 445.e5 (2020).
- 505 22. Fornito, A. *et al.* Genetic influences on cost-efficient organization of human cortical  
506 functional networks. *J. Neurosci. Off. J. Soc. Neurosci.* **31**, 3261–3270 (2011).
- 507 23. Smith, S. M. *et al.* An expanded set of genome-wide association studies of brain imaging  
508 phenotypes in UK Biobank. *Nat. Neurosci.* (2021) doi:10.1038/s41593-021-00826-4.
- 509 24. Yang, Z. *et al.* Genetic and Environmental Contributions to Functional Connectivity  
510 Architecture of the Human Brain. *Cereb. Cortex N. Y. N 1991* **26**, 2341–2352 (2016).
- 511 25. Cao, H., Zhou, H. & Cannon, T. D. Functional connectome-wide associations of  
512 schizophrenia polygenic risk. *Mol. Psychiatry* (2020) doi:10.1038/s41380-020-0699-3.
- 513 26. Miller, D. R. *et al.* Posttraumatic stress disorder symptom severity is associated with reduced  
514 default mode network connectivity in individuals with elevated genetic risk for  
515 psychopathology. *Depress. Anxiety* **34**, 632–640 (2017).
- 516 27. Hibar, D. P. *et al.* Cortical abnormalities in bipolar disorder: an MRI analysis of 6503  
517 individuals from the ENIGMA Bipolar Disorder Working Group. *Mol. Psychiatry* **23**, 932–  
518 942 (2018).
- 519 28. Walton, E. *et al.* Exploration of Shared Genetic Architecture Between Subcortical Brain  
520 Volumes and Anorexia Nervosa. *Mol. Neurobiol.* **56**, 5146–5156 (2019).

Roelfs et al. | Genetics of the brain functional connectome

- 521 29. Zhao, B. *et al.* Large-scale GWAS reveals genetic architecture of brain white matter  
522 microstructure and genetic overlap with cognitive and mental health traits (n = 17,706).  
523 *Mol. Psychiatry* (2019) doi:10.1038/s41380-019-0569-z.
- 524 30. van der Meer, D. *et al.* Understanding the genetic determinants of the brain with MOSTest.  
525 *Nat. Commun.* **11**, 3512 (2020).
- 526 31. Smith, S. M. *et al.* Network modelling methods for FMRI. *NeuroImage* **54**, 875–891 (2011).
- 527 32. Smitha, K. A. *et al.* Resting state fMRI: A review on methods in resting state connectivity  
528 analysis and resting state networks. *Neuroradiol. J.* **30**, 305–317 (2017).
- 529 33. Kaufmann, T. *et al.* Disintegration of Sensorimotor Brain Networks in Schizophrenia.  
530 *Schizophr. Bull.* **41**, 1326–1335 (2015).
- 531 34. Shi, H., Mancuso, N., Spendlove, S. & Pasaniuc, B. Local Genetic Correlation Gives Insights  
532 into the Shared Genetic Architecture of Complex Traits. *Am. J. Hum. Genet.* **101**, 737–751  
533 (2017).
- 534 35. Smeland, O. B. *et al.* Discovery of shared genomic loci using the conditional false discovery  
535 rate approach. *Hum. Genet.* **139**, 85–94 (2020).
- 536 36. Demontis, D. *et al.* Discovery of the first genome-wide significant risk loci for attention  
537 deficit/hyperactivity disorder. *Nat. Genet.* **51**, 63–75 (2019).
- 538 37. Duncan, L. *et al.* Significant Locus and Metabolic Genetic Correlations Revealed in Genome-  
539 Wide Association Study of Anorexia Nervosa. *Am. J. Psychiatry* **174**, 850–858 (2017).
- 540 38. Otowa, T. *et al.* Meta-analysis of genome-wide association studies of anxiety disorders. *Mol.*  
541 *Psychiatry* **21**, 1391–1399 (2016).
- 542 39. Grove, J. *et al.* Identification of common genetic risk variants for autism spectrum disorder.  
543 *Nat. Genet.* **51**, 431–444 (2019).



- 544 40. Mullins, N. *et al.* Genome-wide association study of more than 40,000 bipolar disorder cases  
545 provides new insights into the underlying biology. *Nat. Genet.* **53**, 817–829 (2021).
- 546 41. Wray, N. R. *et al.* Genome-wide association analyses identify 44 risk variants and refine the  
547 genetic architecture of major depression. *Nat. Genet.* **50**, 668–681 (2018).
- 548 42. Duncan, L. E. *et al.* Largest GWAS of PTSD (N=20□070) yields genetic overlap with  
549 schizophrenia and sex differences in heritability. *Mol. Psychiatry* **23**, 666–673 (2018).
- 550 43. Pardiñas, A. F. *et al.* Common schizophrenia alleles are enriched in mutation-intolerant genes  
551 and in regions under strong background selection. *Nat. Genet.* **50**, 381–389 (2018).
- 552 44. Watanabe, K. *et al.* A global overview of pleiotropy and genetic architecture in complex  
553 traits. *Nat. Genet.* **51**, 1339–1348 (2019).
- 554 45. Jiang, X. *et al.* Genome-wide association study in 79,366 European-ancestry individuals  
555 informs the genetic architecture of 25-hydroxyvitamin D levels. *Nat. Commun.* **9**, 260 (2018).
- 556 46. Andreassen, O. A. *et al.* Improved detection of common variants associated with  
557 schizophrenia and bipolar disorder using pleiotropy-informed conditional false discovery  
558 rate. *PLoS Genet* **9**, e1003455 (2013).
- 559 47. Watanabe, K., Taskesen, E., van Bochoven, A. & Posthuma, D. Functional mapping and  
560 annotation of genetic associations with FUMA. *Nat. Commun.* **8**, 1826 (2017).
- 561 48. Koopmans, F. *et al.* SynGO: An Evidence-Based, Expert-Curated Knowledge Base for the  
562 Synapse. *Neuron* **103**, 217-234.e4 (2019).
- 563 49. Dean, C. *et al.* Synaptotagmin-IV modulates synaptic function and long-term potentiation by  
564 regulating BDNF release. *Nat. Neurosci.* **12**, 767–776 (2009).
- 565 50. Dean, C. *et al.* Neurexin mediates the assembly of presynaptic terminals. *Nat. Neurosci.* **6**,  
566 708–716 (2003).

- 567 51. Jassal, B. *et al.* The reactome pathway knowledgebase. *Nucleic Acids Res.* **48**, D498–D503  
568 (2020).
- 569 52. Friston, K., Brown, H. R., Siemerikus, J. & Stephan, K. E. The dysconnection hypothesis  
570 (2016). *Schizophr. Res.* **176**, 83–94 (2016).
- 571 53. van den Heuvel, M. P. & Sporns, O. A cross-disorder connectome landscape of brain  
572 dysconnectivity. *Nat. Rev. Neurosci.* **20**, 435–446 (2019).
- 573 54. Kaufmann, T. *et al.* Task modulations and clinical manifestations in the brain functional  
574 connectome in 1615 fMRI datasets. *NeuroImage* **147**, 243–252 (2017).
- 575 55. Frei, O. *et al.* Bivariate causal mixture model quantifies polygenic overlap between complex  
576 traits beyond genetic correlation. *Nat. Commun.* **10**, 2417–2417 (2019).
- 577 56. Werme, J., van der Sluis, S., Posthuma, D. & de Leeuw, C. A. LAVA: An integrated  
578 framework for local genetic correlation analysis. *bioRxiv* 2020.12.31.424652 (2021)  
579 doi:10.1101/2020.12.31.424652.
- 580 57. Finn, E. S. *et al.* Functional connectome fingerprinting: identifying individuals using patterns  
581 of brain connectivity. *Nat. Neurosci.* **18**, 1664–1671 (2015).
- 582 58. Kaufmann, T. *et al.* Delayed stabilization and individualization in connectome development  
583 are related to psychiatric disorders. *Nat. Neurosci.* **20**, 513–515 (2017).
- 584 59. Lynall, M.-E. *et al.* Functional connectivity and brain networks in schizophrenia. *J. Neurosci.*  
585 *Off. J. Soc. Neurosci.* **30**, 9477–9487 (2010).
- 586 60. Rolls, E. T., Cheng, W. & Feng, J. Brain dynamics: the temporal variability of connectivity,  
587 and differences in schizophrenia and ADHD. *Transl. Psychiatry* **11**, 70 (2021).
- 588 61. Shadrin, A. A. *et al.* Multivariate genome-wide association study identifies 780 unique  
589 genetic loci associated with cortical morphology. *bioRxiv* 2020.10.22.350298 (2021)  
590 doi:10.1101/2020.10.22.350298.

- 591 62. Shadrin, A. A. *et al.* Vertex-wise multivariate genome-wide association study identifies 780  
592 unique genetic loci associated with cortical morphology. *NeuroImage* **244**, 118603 (2021).
- 593 63. Shadrin, A. A. *et al.* Novel Loci Associated With Attention-Deficit/Hyperactivity Disorder  
594 Are Revealed by Leveraging Polygenic Overlap With Educational Attainment. *J. Am. Acad.*  
595 *Child Adolesc. Psychiatry* **57**, 86–95 (2018).
- 596 64. Bycroft, C. *et al.* The UK Biobank resource with deep phenotyping and genomic data. *Nature*  
597 **562**, 203–209 (2018).
- 598 65. Bycroft, C. *et al.* Genome-wide genetic data on 500,000 UK Biobank participants. *bioRxiv*  
599 166298 (2017) doi:10.1101/166298.
- 600 66. Alfaro-Almagro, F. *et al.* Image processing and Quality Control for the first 10,000 brain  
601 imaging datasets from UK Biobank. *NeuroImage* **166**, 400–424 (2018).
- 602 67. Jenkinson, M., Beckmann, C. F., Behrens, T. E. J., Woolrich, M. W. & Smith, S. M. FSL. 20  
603 *YEARS FMRI* **62**, 782–790 (2012).
- 604 68. Smith, S. M. *et al.* Advances in functional and structural MR image analysis and  
605 implementation as FSL. *NeuroImage* **23 Suppl 1**, S208-219 (2004).
- 606 69. Griffanti, L. *et al.* ICA-based artefact removal and accelerated fMRI acquisition for improved  
607 resting state network imaging. *NeuroImage* **95**, 232–247 (2014).
- 608 70. Salimi-Khorshidi, G. *et al.* Automatic denoising of functional MRI data: combining  
609 independent component analysis and hierarchical fusion of classifiers. *NeuroImage* **90**, 449–  
610 468 (2014).
- 611 71. Beckmann, C. F. & Smith, S. M. Probabilistic independent component analysis for functional  
612 magnetic resonance imaging. *IEEE Trans. Med. Imaging* **23**, 137–152 (2004).
- 613 72. Smith, S. M. *et al.* Functional connectomics from resting-state fMRI. *Spec. Issue Connect.*  
614 **17**, 666–682 (2013).

Roelfs et al. | Genetics of the brain functional connectome

- 615 73. Woolrich, M. W., Behrens, T. E. J., Beckmann, C. F., Jenkinson, M. & Smith, S. M.  
616 Multilevel linear modelling for fMRI group analysis using Bayesian inference. *NeuroImage*  
617 **21**, 1732–1747 (2004).
- 618 74. Chang, C. C. *et al.* Second-generation PLINK: rising to the challenge of larger and richer  
619 datasets. *Gigascience* **4**, 7 (2015).
- 620 75. Finucane, H. K. *et al.* Partitioning heritability by functional annotation using genome-wide  
621 association summary statistics. *Nat. Genet.* **47**, 1228–1235 (2015).
- 622 76. Bulik-Sullivan, B. K. *et al.* LD Score regression distinguishes confounding from polygenicity  
623 in genome-wide association studies. *Nat Genet* **47**, 291–5 (2015).
- 624 77. Bulik-Sullivan, B. *et al.* An atlas of genetic correlations across human diseases and traits. *Nat*  
625 *Genet* **47**, 1236–41 (2015).
- 626 78. Lee, J. J., McGue, M., Iacono, W. G. & Chow, C. C. The accuracy of LD Score regression as  
627 an estimator of confounding and genetic correlations in genome-wide association studies.  
628 *Genet. Epidemiol.* **42**, 783–795 (2018).
- 629 79. Loughnan, R. J. *et al.* Generalization of Cortical MOSTest Genome-Wide Associations  
630 Within and Across Samples. *bioRxiv* 2021.04.23.441215 (2021)  
631 doi:10.1101/2021.04.23.441215.  
632  
633
